# Supplementary material for: Unfolding experimental distortions in beta spectrometry
Source: Frontiers journal article supplement (doi:10.3389/fphy.2024.1435615), 2024-08-12
Supplement: Data_Sheet_1.PDF [file Data_Sheet_1.PDF]

## ***Supplementary Material***

We present in this Supplementary Material the full results of our investigation on the performance and the sensitivity to statistical fluctuations of the MLEM and Tikhonov algorithms, evaluated on simulated beta spectra. Twelve radionuclides with various spectrum shapes, energy ranges and counting statistics were selected, matching the experimental limitations of our  $4\pi$  silicon-based detection system.

Each simulated spectrum was determined from a theoretical spectrum convoluted with the response matrix of our apparatus and adding Poisson noise. The same input statistics, ranging from  $10^5$  to  $8.5 \cdot 10^8$ , was considered in each total beta spectrum. However, because of the different theoretical spectral shapes, of the random Poisson noise and of the detection energy threshold of 15 keV applied, this results in different counting statistics in the simulated spectrum for each radionuclide.

For each of the twelve isotopes, we provide in the following a figure that compares the theoretical, true spectrum with the unfolded simulated spectra obtained with the MLEM and Tikhonov algorithms. The same counting statistics of  $10^7$  was considered. Each figure is followed by a table that presents the four root mean square errors (RMSE) described in section 3.1 from the unfolding together with the regularization parameters, over 24 increasing counting statistics. Each RMSE is normalized by the number of counts in the simulated spectrum and expressed in per cent mille (pcm). From inspection of the tables, it is important to note that both algorithms exhibit a similar behavior with the counting statistics: the accuracy of the unfolding process increases with the number of counts in the input spectra. This trend was expected as Poisson noise becomes larger for low counting statistics, increasing the difficulty for both algorithms to regularize the spectra.

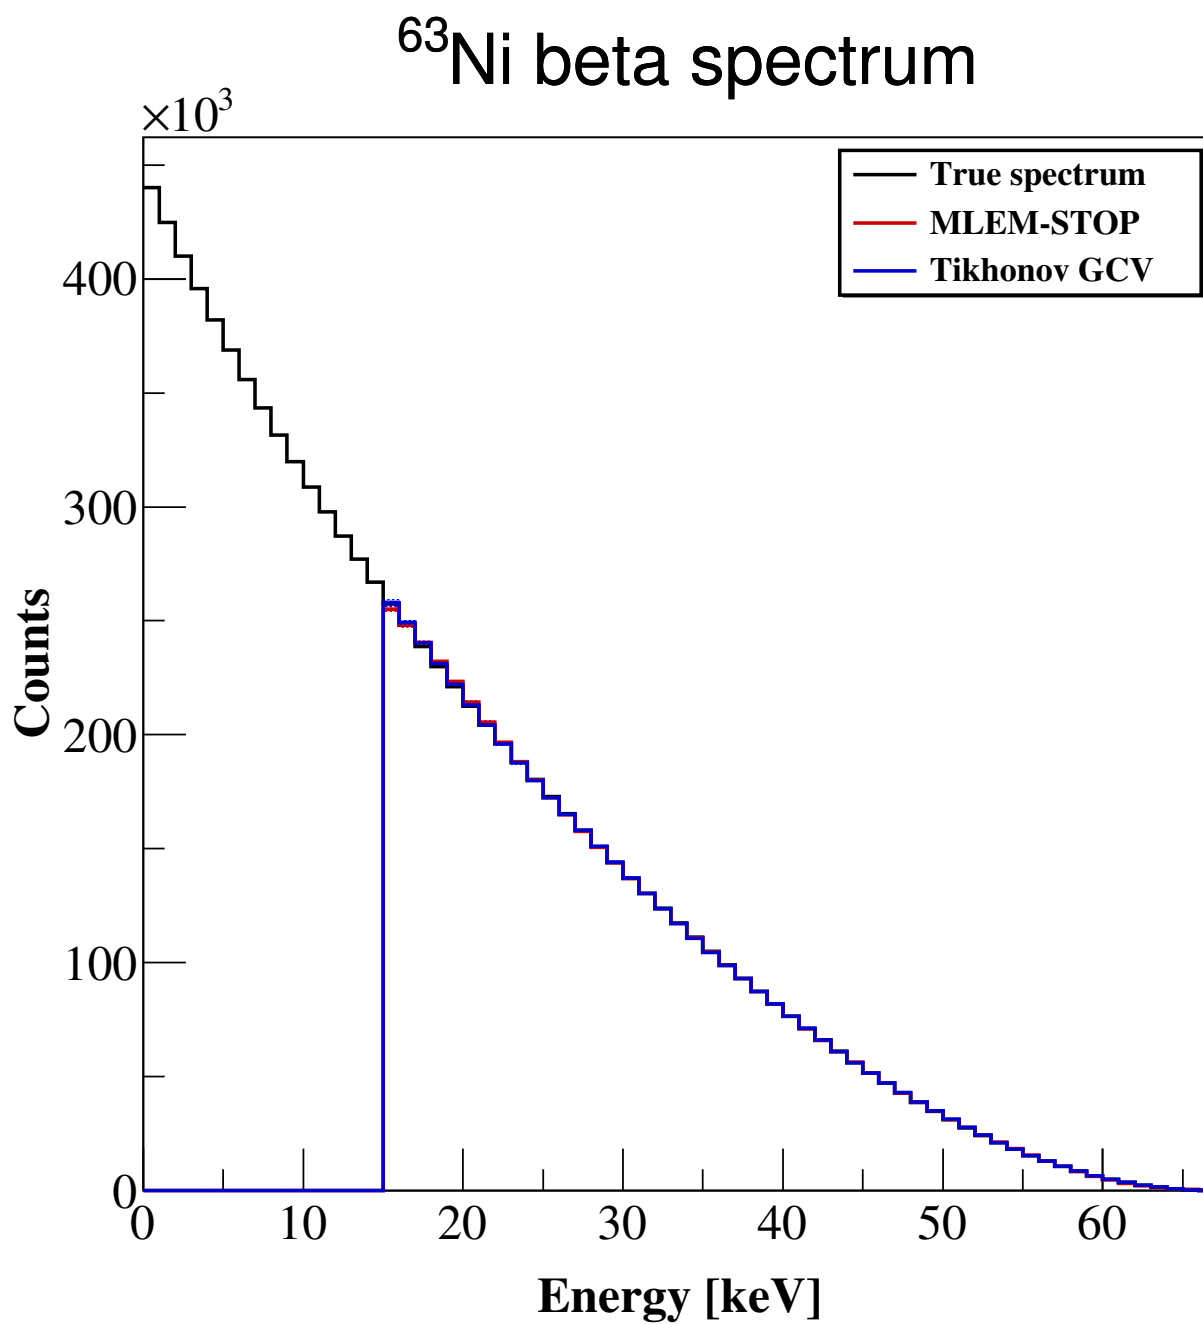

Figure S1: Comparison between the theoretical, true beta spectrum of  $^{63}\text{Ni}$  decay (black) with the MLEM (red) and Tikhonov (blue) unfolded spectra obtained with the MLEM-STOP and the GCV criteria, respectively.

| Beta<br>source   | Counting<br>statistics | RMSE <sup>MLEM</sup> <sub>min</sub><br>[reg. param.] | RMSE <sup>MLEM</sup> <sub>stop</sub><br>[reg. param.] | RMSE <sup>Tik</sup> <sub>min</sub><br>[reg. param.] | RMSE <sup>Tik</sup> <sub>gcv</sub><br>[reg. param.] |
|------------------|------------------------|------------------------------------------------------|-------------------------------------------------------|-----------------------------------------------------|-----------------------------------------------------|
| <sup>63</sup> Ni | 3.2e+04                | 46.4 [6]                                             | 58.0 [4]                                              | 45.8 [4.0e-03]                                      | 46.2 [5.2e-03]                                      |
|                  | 8.0e+04                | 38.3 [9]                                             | 49.8 [5]                                              | 32.7 [5.2e-04]                                      | 32.9 [6.7e-04]                                      |
|                  | 1.3e+05                | 34.7 [11]                                            | 43.4 [6]                                              | 28.4 [2.4e-04]                                      | 28.7 [3.1e-04]                                      |
|                  | 1.8e+05                | 32.0 [12]                                            | 44.3 [6]                                              | 25.0 [1.1e-04]                                      | 25.1 [1.5e-04]                                      |
|                  | 2.2e+05                | 30.5 [13]                                            | 39.1 [7]                                              | 23.6 [8.8e-05]                                      | 23.6 [8.8e-05]                                      |
|                  | 2.7e+05                | 29.2 [15]                                            | 39.4 [7]                                              | 22.2 [5.3e-05]                                      | 22.2 [5.3e-05]                                      |
|                  | 3.2e+05                | 28.1 [16]                                            | 39.7 [7]                                              | 20.9 [4.1e-05]                                      | 20.9 [4.1e-05]                                      |
|                  | 8.0e+05                | 23.8 [22]                                            | 30.5 [10]                                             | 16.6 [1.1e-05]                                      | 17.1 [6.8e-06]                                      |
|                  | 1.3e+06                | 22.0 [26]                                            | 28.7 [11]                                             | 15.1 [5.3e-06]                                      | 15.6 [3.2e-06]                                      |
|                  | 1.8e+06                | 21.0 [30]                                            | 25.8 [13]                                             | 14.2 [3.2e-06]                                      | 14.7 [1.9e-06]                                      |
|                  | 2.2e+06                | 20.3 [33]                                            | 24.7 [14]                                             | 13.7 [2.5e-06]                                      | 14.4 [1.1e-06]                                      |
|                  | 2.7e+06                | 19.7 [37]                                            | 23.8 [15]                                             | 13.3 [1.9e-06]                                      | 13.9 [8.9e-07]                                      |
|                  | 3.2e+06                | 18.8 [244]                                           | 23.0 [16]                                             | 13.0 [1.5e-06]                                      | 13.4 [6.9e-07]                                      |
|                  | 8.0e+06                | 14.4 [333]                                           | 19.2 [24]                                             | 11.5 [3.2e-07]                                      | 12.0 [1.2e-07]                                      |
|                  | 1.3e+07                | 12.8 [379]                                           | 17.9 [29]                                             | 10.9 [1.5e-07]                                      | 11.1 [5.4e-08]                                      |
|                  | 1.8e+07                | 11.8 [413]                                           | 17.1 [33]                                             | 10.3 [7.0e-09]                                      | 10.6 [3.2e-08]                                      |
|                  | 2.2e+07                | 11.2 [442]                                           | 16.5 [37]                                             | 9.8 [4.2e-09]                                       | 10.2 [1.9e-08]                                      |
|                  | 2.7e+07                | 10.8 [468]                                           | 16.1 [41]                                             | 9.5 [3.3e-09]                                       | 9.8 [1.2e-08]                                       |
|                  | 3.2e+07                | 10.4 [492]                                           | 15.7 [44]                                             | 9.2 [2.5e-09]                                       | 9.6 [9.0e-09]                                       |
|                  | 8.0e+07                | 8.7 [705]                                            | 13.7 [69]                                             | 8.1 [7.0e-10]                                       | 8.1 [1.2e-09]                                       |
|                  | 1.3e+08                | 8.0 [872]                                            | 12.9 [86]                                             | 7.6 [3.3e-10]                                       | 7.7 [5.5e-10]                                       |
|                  | 1.8e+08                | 7.6 [997]                                            | 12.3 [101]                                            | 7.4 [2.0e-10]                                       | 7.4 [2.5e-10]                                       |
|                  | 2.2e+08                | 7.2 [1094]                                           | 11.8 [114]                                            | 7.2 [1.2e-10]                                       | 7.2 [2.0e-10]                                       |
|                  | 2.7e+08                | 7.0 [1176]                                           | 11.5 [126]                                            | 7.0 [9.2e-11]                                       | 7.1 [1.2e-10]                                       |

Table S1: Comparison of the four RMSE described in section 3.1 obtained with MLEM and Tikhonov methods on simulated data for <sup>63</sup>Ni beta spectrum. RMSE are normalized by the counting statistics and expressed in pcm. Numbers in brackets are the regularization parameter in each case.

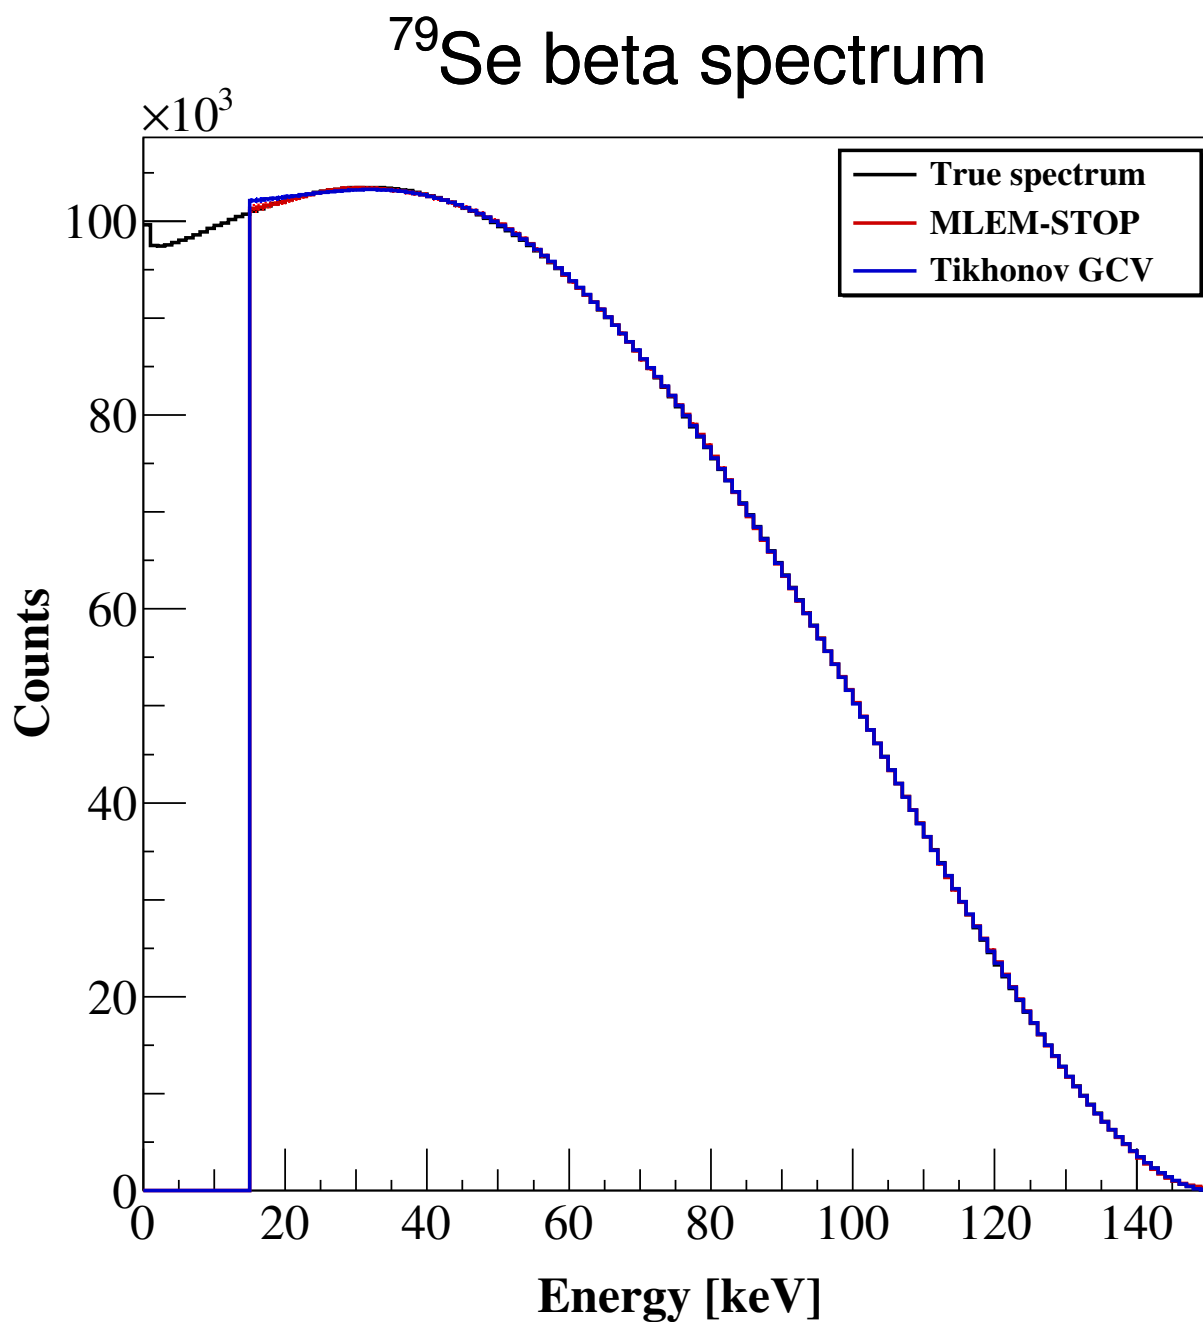

Figure S2: Comparison between the theoretical, true beta spectrum of  $^{79}\text{Se}$  decay (black) with the MLEM (red) and Tikhonov (blue) unfolded spectra obtained with the MLEM-STOP and the GCV criteria, respectively.

| Beta<br>source   | Counting<br>statistics | $\text{RMSE}_{\min}^{\text{MLEM}}$<br>[reg. param.] | $\text{RMSE}_{\text{stop}}^{\text{MLEM}}$<br>[reg. param.] | $\text{RMSE}_{\min}^{\text{Tik}}$<br>[reg. param.] | $\text{RMSE}_{\text{gcv}}^{\text{Tik}}$<br>[reg. param.] |
|------------------|------------------------|-----------------------------------------------------|------------------------------------------------------------|----------------------------------------------------|----------------------------------------------------------|
| $^{79}\text{Se}$ | 7.1e+04                | 12.7 [3]                                            | 12.7 [3]                                                   | 7.8 [1.8e+00]                                      | 7.9 [2.4e+00]                                            |
|                  | 1.8e+05                | 8.9 [3]                                             | 10.2 [4]                                                   | 6.1 [2.4e-01]                                      | 6.4 [5.1e-01]                                            |
|                  | 2.9e+05                | 7.3 [3]                                             | 8.3 [4]                                                    | 5.8 [1.1e-01]                                      | 6.0 [2.4e-01]                                            |
|                  | 3.9e+05                | 6.1 [3]                                             | 6.8 [4]                                                    | 5.3 [6.6e-02]                                      | 5.6 [1.4e-01]                                            |
|                  | 5.0e+05                | 5.7 [3]                                             | 6.2 [4]                                                    | 5.0 [4.0e-02]                                      | 5.4 [1.1e-01]                                            |
|                  | 6.1e+05                | 5.0 [3]                                             | 5.4 [4]                                                    | 4.8 [2.4e-02]                                      | 5.0 [6.6e-02]                                            |
|                  | 7.1e+05                | 4.5 [3]                                             | 4.7 [4]                                                    | 4.7 [1.9e-02]                                      | 5.2 [6.6e-02]                                            |
|                  | 1.8e+06                | 3.3 [4]                                             | 3.3 [4]                                                    | 3.5 [3.1e-03]                                      | 3.9 [1.1e-02]                                            |
|                  | 2.9e+06                | 2.6 [4]                                             | 2.6 [4]                                                    | 3.0 [1.1e-03]                                      | 3.3 [4.0e-03]                                            |
|                  | 3.9e+06                | 2.3 [4]                                             | 2.3 [4]                                                    | 2.7 [5.2e-04]                                      | 3.0 [2.4e-03]                                            |
|                  | 5.0e+06                | 2.1 [4]                                             | 2.2 [5]                                                    | 2.4 [2.4e-04]                                      | 2.8 [1.4e-03]                                            |
|                  | 6.1e+06                | 1.8 [5]                                             | 1.8 [5]                                                    | 2.1 [1.1e-04]                                      | 2.8 [1.4e-03]                                            |
|                  | 7.1e+06                | 1.7 [5]                                             | 1.7 [5]                                                    | 2.0 [6.8e-05]                                      | 2.5 [8.7e-04]                                            |
|                  | 1.8e+07                | 1.2 [5]                                             | 1.2 [5]                                                    | 1.3 [1.5e-05]                                      | 1.7 [1.5e-04]                                            |
|                  | 2.9e+07                | 1.1 [6]                                             | 1.1 [5]                                                    | 1.2 [8.8e-06]                                      | 1.4 [5.3e-05]                                            |
|                  | 3.9e+07                | 1.0 [6]                                             | 1.0 [6]                                                    | 1.0 [4.1e-06]                                      | 1.3 [3.2e-05]                                            |
|                  | 5.0e+07                | 0.9 [7]                                             | 0.9 [6]                                                    | 0.9 [2.5e-06]                                      | 1.2 [2.4e-05]                                            |
|                  | 6.1e+07                | 0.9 [7]                                             | 0.9 [6]                                                    | 0.9 [2.5e-06]                                      | 1.1 [1.5e-05]                                            |
|                  | 7.1e+07                | 0.8 [7]                                             | 0.8 [6]                                                    | 0.8 [1.5e-06]                                      | 1.0 [1.1e-05]                                            |
|                  | 1.8e+08                | 0.7 [9]                                             | 0.7 [7]                                                    | 0.6 [4.1e-07]                                      | 0.7 [1.9e-06]                                            |
|                  | 2.9e+08                | 0.6 [19]                                            | 0.6 [8]                                                    | 0.5 [1.9e-07]                                      | 0.6 [8.9e-07]                                            |
|                  | 3.9e+08                | 0.6 [22]                                            | 0.6 [9]                                                    | 0.4 [1.2e-07]                                      | 0.5 [5.3e-07]                                            |
|                  | 5.0e+08                | 0.5 [24]                                            | 0.6 [9]                                                    | 0.4 [9.0e-08]                                      | 0.4 [3.2e-07]                                            |
|                  | 6.1e+08                | 0.5 [26]                                            | 0.6 [10]                                                   | 0.4 [5.4e-08]                                      | 0.4 [2.5e-07]                                            |

Table S2: Comparison of the four RMSE described in section 3.1 obtained with MLEM and Tikhonov methods on simulated data for  $^{79}\text{Se}$  beta spectrum. RMSE are normalized by the counting statistics and expressed in pcm. Numbers in brackets are the regularization parameter in each case.

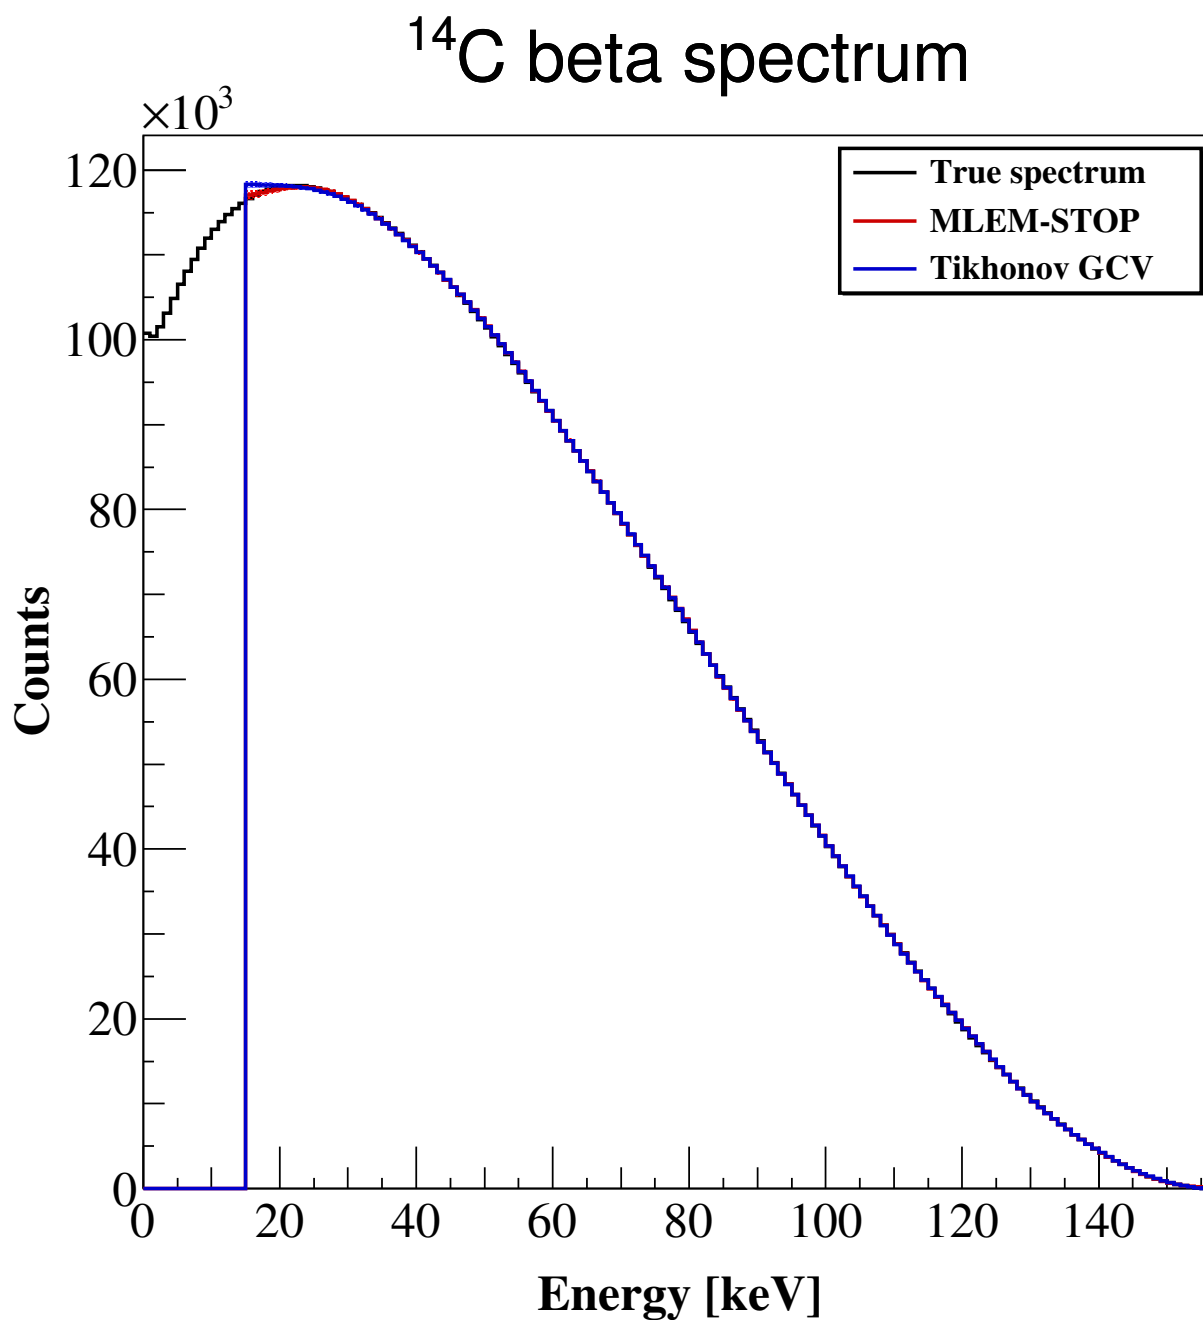

Figure S3: Comparison between the theoretical, true beta spectrum of  $^{14}\text{C}$  decay (black) with the MLEM (red) and Tikhonov (blue) unfolded spectra obtained with the MLEM-STOP and the GCV criteria, respectively.

| Beta<br>source  | Counting<br>statistics | RMSE <sup>MLEM</sup> <sub>min</sub><br>[reg. param.] | RMSE <sup>MLEM</sup> <sub>stop</sub><br>[reg. param.] | RMSE <sup>Tik</sup> <sub>min</sub><br>[reg. param.] | RMSE <sup>Tik</sup> <sub>gcv</sub><br>[reg. param.] |
|-----------------|------------------------|------------------------------------------------------|-------------------------------------------------------|-----------------------------------------------------|-----------------------------------------------------|
| <sup>14</sup> C | 6.9e+04                | 13.0 [3]                                             | 13.0 [3]                                              | 10.6 [1.4e+00]                                      | 11.4 [5.1e+00]                                      |
|                 | 1.7e+05                | 8.9 [3]                                              | 10.0 [4]                                              | 9.0 [1.4e-01]                                       | 10.1 [8.5e-01]                                      |
|                 | 2.8e+05                | 6.9 [3]                                              | 7.5 [4]                                               | 8.3 [5.1e-02]                                       | 9.3 [3.1e-01]                                       |
|                 | 3.8e+05                | 6.3 [3]                                              | 6.6 [4]                                               | 7.7 [1.9e-02]                                       | 9.0 [1.8e-01]                                       |
|                 | 4.8e+05                | 5.2 [4]                                              | 5.2 [4]                                               | 7.1 [4.0e-03]                                       | 8.6 [1.1e-01]                                       |
|                 | 5.9e+05                | 5.2 [4]                                              | 5.2 [4]                                               | 6.8 [5.2e-03]                                       | 8.1 [6.6e-02]                                       |
|                 | 6.9e+05                | 4.8 [4]                                              | 4.8 [4]                                               | 6.4 [3.1e-03]                                       | 7.6 [4.0e-02]                                       |
|                 | 1.7e+06                | 2.8 [4]                                              | 2.8 [4]                                               | 4.2 [1.9e-04]                                       | 5.8 [5.2e-03]                                       |
|                 | 2.8e+06                | 2.6 [4]                                              | 2.7 [5]                                               | 3.6 [8.8e-05]                                       | 4.5 [1.1e-03]                                       |
|                 | 3.8e+06                | 2.3 [5]                                              | 2.3 [5]                                               | 3.2 [5.3e-05]                                       | 4.1 [6.7e-04]                                       |
|                 | 4.8e+06                | 2.1 [5]                                              | 2.1 [5]                                               | 2.9 [3.2e-05]                                       | 3.7 [4.0e-04]                                       |
|                 | 5.9e+06                | 1.7 [5]                                              | 1.7 [5]                                               | 2.5 [2.4e-05]                                       | 3.5 [3.1e-04]                                       |
|                 | 6.9e+06                | 1.6 [5]                                              | 1.6 [5]                                               | 2.4 [1.9e-05]                                       | 3.2 [1.9e-04]                                       |
|                 | 1.7e+07                | 1.3 [6]                                              | 1.3 [6]                                               | 1.7 [4.1e-06]                                       | 2.2 [3.2e-05]                                       |
|                 | 2.8e+07                | 1.1 [6]                                              | 1.1 [6]                                               | 1.4 [1.9e-06]                                       | 1.8 [1.1e-05]                                       |
|                 | 3.8e+07                | 1.1 [7]                                              | 1.1 [6]                                               | 1.3 [1.1e-06]                                       | 1.6 [6.8e-06]                                       |
|                 | 4.8e+07                | 1.0 [7]                                              | 1.0 [6]                                               | 1.2 [8.9e-07]                                       | 1.4 [4.1e-06]                                       |
|                 | 5.9e+07                | 0.9 [8]                                              | 1.0 [6]                                               | 1.1 [6.9e-07]                                       | 1.3 [2.5e-06]                                       |
|                 | 6.9e+07                | 0.9 [8]                                              | 0.9 [7]                                               | 1.0 [5.3e-07]                                       | 1.2 [1.9e-06]                                       |
|                 | 1.7e+08                | 0.7 [20]                                             | 0.8 [7]                                               | 0.8 [1.2e-07]                                       | 0.8 [3.2e-07]                                       |
|                 | 2.8e+08                | 0.6 [25]                                             | 0.8 [8]                                               | 0.6 [5.4e-08]                                       | 0.7 [1.2e-07]                                       |
|                 | 3.8e+08                | 0.6 [31]                                             | 0.7 [8]                                               | 0.6 [3.2e-08]                                       | 0.6 [5.4e-08]                                       |
|                 | 4.8e+08                | 0.5 [35]                                             | 0.7 [9]                                               | 0.5 [1.9e-08]                                       | 0.6 [3.2e-08]                                       |
|                 | 5.9e+08                | 0.5 [40]                                             | 0.7 [9]                                               | 0.5 [1.5e-08]                                       | 0.5 [2.5e-08]                                       |

Table S3: Comparison of the four RMSE described in section 3.1 obtained with MLEM and Tikhonov methods on simulated data for <sup>14</sup>C beta spectrum. RMSE are normalized by the counting statistics and expressed in pcm. Numbers in brackets are the regularization parameter in each case.

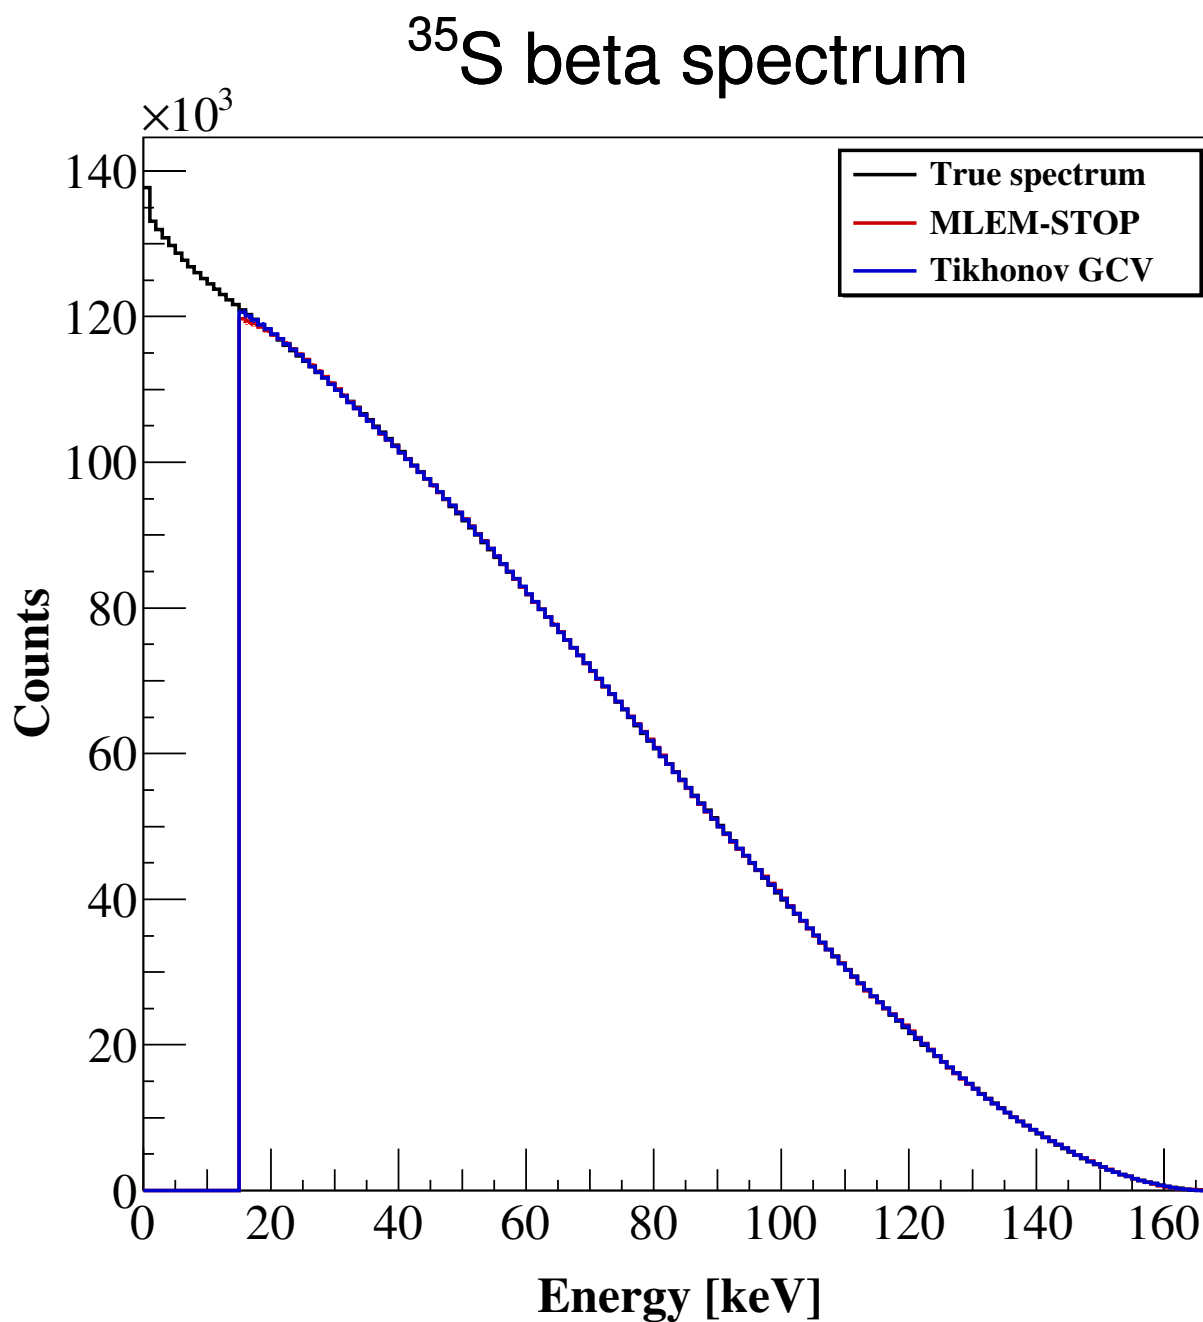

Figure S4: Comparison between the theoretical, true beta spectrum of  $^{35}\text{S}$  decay (black) with the MLEM (red) and Tikhonov (blue) unfolded spectra obtained with the MLEM-STOP and the GCV criteria, respectively.



| Beta<br>source  | Counting<br>statistics | $\text{RMSE}_{\min}^{\text{MLEM}}$<br>[reg. param.] | $\text{RMSE}_{\text{stop}}^{\text{MLEM}}$<br>[reg. param.] | $\text{RMSE}_{\min}^{\text{Tik}}$<br>[reg. param.] | $\text{RMSE}_{\text{gcv}}^{\text{Tik}}$<br>[reg. param.] |
|-----------------|------------------------|-----------------------------------------------------|------------------------------------------------------------|----------------------------------------------------|----------------------------------------------------------|
| $^{35}\text{S}$ | 6.6e+04                | 11.3 [3]                                            | 12.6 [4]                                                   | 4.6 [6.6e-01]                                      | 8.3 [3.9e+00]                                            |
|                 | 1.7e+05                | 8.7 [4]                                             | 8.7 [4]                                                    | 3.5 [1.8e-01]                                      | 3.8 [1.1e-01]                                            |
|                 | 2.7e+05                | 6.6 [4]                                             | 6.6 [4]                                                    | 3.3 [8.6e-02]                                      | 3.4 [6.6e-02]                                            |
|                 | 3.6e+05                | 6.5 [4]                                             | 6.5 [4]                                                    | 2.8 [6.6e-02]                                      | 3.6 [2.4e-02]                                            |
|                 | 4.6e+05                | 5.9 [4]                                             | 5.9 [4]                                                    | 2.6 [4.0e-02]                                      | 3.2 [1.9e-02]                                            |
|                 | 5.6e+05                | 4.9 [5]                                             | 5.1 [4]                                                    | 2.5 [3.1e-02]                                      | 2.7 [1.9e-02]                                            |
|                 | 6.6e+05                | 4.6 [5]                                             | 5.0 [4]                                                    | 2.4 [2.4e-02]                                      | 2.6 [1.4e-02]                                            |
|                 | 1.7e+06                | 3.7 [6]                                             | 3.8 [5]                                                    | 1.8 [6.7e-03]                                      | 2.1 [3.1e-03]                                            |
|                 | 2.6e+06                | 3.1 [7]                                             | 3.6 [5]                                                    | 1.6 [3.1e-03]                                      | 1.8 [1.4e-03]                                            |
|                 | 3.6e+06                | 2.8 [7]                                             | 2.9 [6]                                                    | 1.5 [1.9e-03]                                      | 1.7 [8.7e-04]                                            |
|                 | 4.6e+06                | 2.3 [8]                                             | 2.6 [6]                                                    | 1.4 [1.1e-03]                                      | 1.4 [8.7e-04]                                            |
|                 | 5.6e+06                | 2.2 [9]                                             | 2.6 [6]                                                    | 1.3 [8.7e-04]                                      | 1.3 [6.7e-04]                                            |
|                 | 6.6e+06                | 2.2 [9]                                             | 2.7 [6]                                                    | 1.3 [6.7e-04]                                      | 1.4 [4.0e-04]                                            |
|                 | 1.7e+07                | 1.6 [12]                                            | 2.2 [7]                                                    | 1.1 [1.1e-04]                                      | 1.1 [1.1e-04]                                            |
|                 | 2.6e+07                | 1.4 [14]                                            | 1.8 [8]                                                    | 0.9 [4.1e-05]                                      | 0.9 [5.3e-05]                                            |
|                 | 3.6e+07                | 1.2 [16]                                            | 1.6 [9]                                                    | 0.8 [1.5e-05]                                      | 0.9 [3.2e-05]                                            |
|                 | 4.6e+07                | 1.0 [18]                                            | 1.5 [9]                                                    | 0.7 [6.8e-06]                                      | 0.8 [1.9e-05]                                            |
|                 | 5.6e+07                | 1.1 [18]                                            | 1.6 [9]                                                    | 0.7 [5.3e-06]                                      | 0.8 [1.5e-05]                                            |
|                 | 6.6e+07                | 1.0 [19]                                            | 1.4 [10]                                                   | 0.7 [4.1e-06]                                      | 0.7 [8.8e-06]                                            |
|                 | 1.7e+08                | 0.8 [24]                                            | 1.1 [12]                                                   | 0.5 [6.9e-07]                                      | 0.5 [1.5e-06]                                            |
|                 | 2.6e+08                | 0.7 [28]                                            | 0.9 [14]                                                   | 0.4 [3.2e-07]                                      | 0.4 [5.3e-07]                                            |
|                 | 3.6e+08                | 0.6 [31]                                            | 0.8 [16]                                                   | 0.4 [1.9e-07]                                      | 0.4 [2.5e-07]                                            |
|                 | 4.6e+08                | 0.6 [33]                                            | 0.8 [17]                                                   | 0.4 [1.2e-07]                                      | 0.4 [1.5e-07]                                            |
|                 | 5.6e+08                | 0.6 [35]                                            | 0.7 [18]                                                   | 0.3 [9.0e-08]                                      | 0.3 [1.2e-07]                                            |

Table S4: Comparison of the four RMSE described in section 3.1 obtained with MLEM and Tikhonov methods on simulated data for  $^{35}\text{S}$  beta spectrum. RMSE are normalized by the counting statistics and expressed in pcm. Numbers in brackets are the regularization parameter in each case.

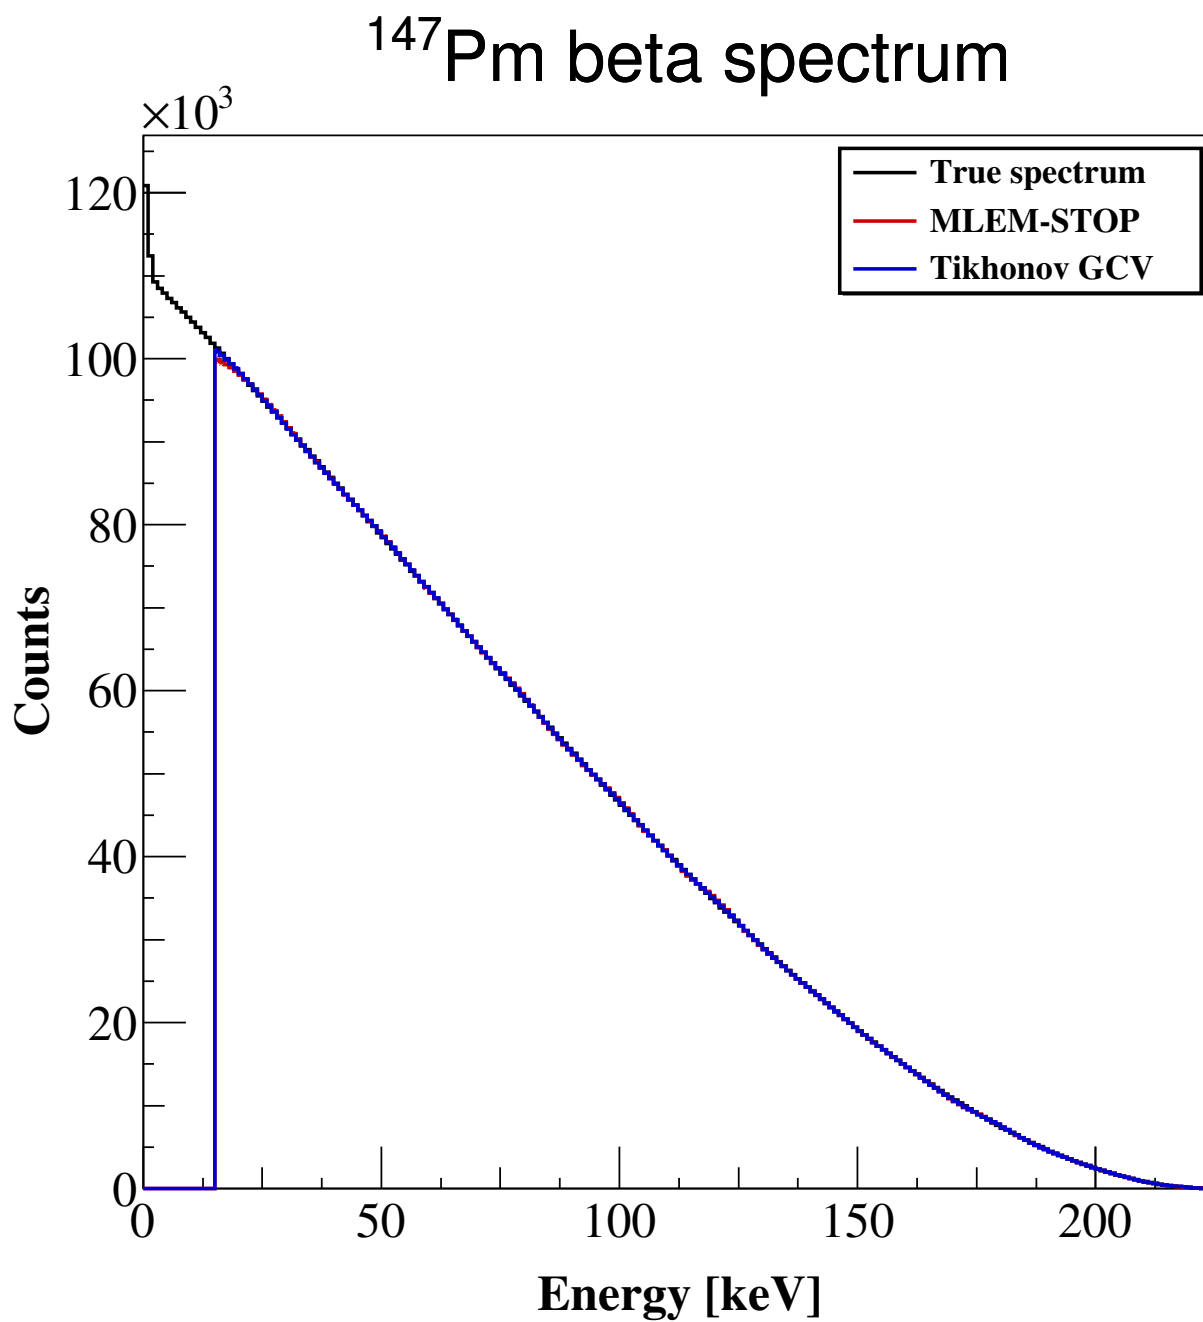

Figure S5: Comparison between the theoretical, true beta spectrum of  $^{147}\text{Pm}$  decay (black) with the MLEM (red) and Tikhonov (blue) unfolded spectra obtained with the MLEM-STOP and the GCV criteria, respectively.

| Beta<br>source    | Counting<br>statistics | $\text{RMSE}_{\min}^{\text{MLEM}}$<br>[reg. param.] | $\text{RMSE}_{\text{stop}}^{\text{MLEM}}$<br>[reg. param.] | $\text{RMSE}_{\min}^{\text{Tik}}$<br>[reg. param.] | $\text{RMSE}_{\text{gcv}}^{\text{Tik}}$<br>[reg. param.] |
|-------------------|------------------------|-----------------------------------------------------|------------------------------------------------------------|----------------------------------------------------|----------------------------------------------------------|
| $^{147}\text{Pm}$ | 7.0e+04                | 11.0 [3]                                            | 11.5 [4]                                                   | 5.5 [8.5e-01]                                      | 6.3 [1.8e+00]                                            |
|                   | 1.7e+05                | 7.4 [4]                                             | 7.4 [4]                                                    | 3.5 [1.8e-01]                                      | 3.6 [1.4e-01]                                            |
|                   | 2.8e+05                | 6.1 [4]                                             | 6.1 [4]                                                    | 3.2 [8.6e-02]                                      | 3.3 [6.6e-02]                                            |
|                   | 3.8e+05                | 5.8 [5]                                             | 5.8 [4]                                                    | 3.0 [6.6e-02]                                      | 3.1 [4.0e-02]                                            |
|                   | 4.9e+05                | 5.2 [5]                                             | 5.5 [4]                                                    | 2.7 [4.0e-02]                                      | 2.9 [2.4e-02]                                            |
|                   | 5.9e+05                | 4.8 [5]                                             | 4.8 [5]                                                    | 2.5 [3.1e-02]                                      | 2.7 [1.9e-02]                                            |
|                   | 7.0e+05                | 4.5 [5]                                             | 4.5 [5]                                                    | 2.4 [2.4e-02]                                      | 2.6 [1.4e-02]                                            |
|                   | 1.7e+06                | 3.2 [6]                                             | 3.5 [5]                                                    | 1.8 [5.2e-03]                                      | 1.9 [3.1e-03]                                            |
|                   | 2.8e+06                | 2.7 [7]                                             | 2.8 [6]                                                    | 1.6 [2.4e-03]                                      | 1.6 [1.9e-03]                                            |
|                   | 3.8e+06                | 2.6 [8]                                             | 2.8 [6]                                                    | 1.5 [1.4e-03]                                      | 1.6 [8.7e-04]                                            |
|                   | 4.9e+06                | 2.2 [8]                                             | 2.5 [6]                                                    | 1.4 [8.7e-04]                                      | 1.4 [6.7e-04]                                            |
|                   | 5.9e+06                | 2.2 [9]                                             | 2.6 [6]                                                    | 1.3 [8.7e-04]                                      | 1.4 [4.0e-04]                                            |
|                   | 7.0e+06                | 2.1 [9]                                             | 2.6 [6]                                                    | 1.3 [5.2e-04]                                      | 1.3 [4.0e-04]                                            |
|                   | 1.7e+07                | 1.5 [12]                                            | 1.8 [8]                                                    | 1.0 [1.1e-04]                                      | 1.0 [8.8e-05]                                            |
|                   | 2.8e+07                | 1.3 [14]                                            | 1.7 [8]                                                    | 0.9 [3.2e-05]                                      | 0.9 [4.1e-05]                                            |
|                   | 3.8e+07                | 1.1 [16]                                            | 1.4 [9]                                                    | 0.8 [1.5e-05]                                      | 0.8 [2.4e-05]                                            |
|                   | 4.9e+07                | 1.0 [18]                                            | 1.2 [10]                                                   | 0.7 [6.8e-06]                                      | 0.8 [1.9e-05]                                            |
|                   | 5.9e+07                | 0.9 [19]                                            | 1.2 [10]                                                   | 0.7 [5.3e-06]                                      | 0.7 [1.1e-05]                                            |
|                   | 7.0e+07                | 0.9 [19]                                            | 1.2 [10]                                                   | 0.7 [4.1e-06]                                      | 0.7 [8.8e-06]                                            |
|                   | 1.7e+08                | 0.7 [24]                                            | 0.9 [13]                                                   | 0.5 [6.9e-07]                                      | 0.5 [1.5e-06]                                            |
|                   | 2.8e+08                | 0.6 [28]                                            | 0.8 [14]                                                   | 0.5 [3.2e-07]                                      | 0.5 [5.3e-07]                                            |
|                   | 3.8e+08                | 0.6 [31]                                            | 0.7 [16]                                                   | 0.4 [1.9e-07]                                      | 0.4 [3.2e-07]                                            |
|                   | 4.9e+08                | 0.6 [33]                                            | 0.7 [17]                                                   | 0.4 [1.2e-07]                                      | 0.4 [1.9e-07]                                            |
|                   | 5.9e+08                | 0.5 [35]                                            | 0.7 [18]                                                   | 0.4 [9.0e-08]                                      | 0.4 [1.2e-07]                                            |

Table S5: Comparison of the four RMSE described in section 3.1 obtained with MLEM and Tikhonov methods on simulated data for  $^{147}\text{Pm}$  beta spectrum. RMSE are normalized by the counting statistics and expressed in pcm. Numbers in brackets are the regularization parameter in each case.

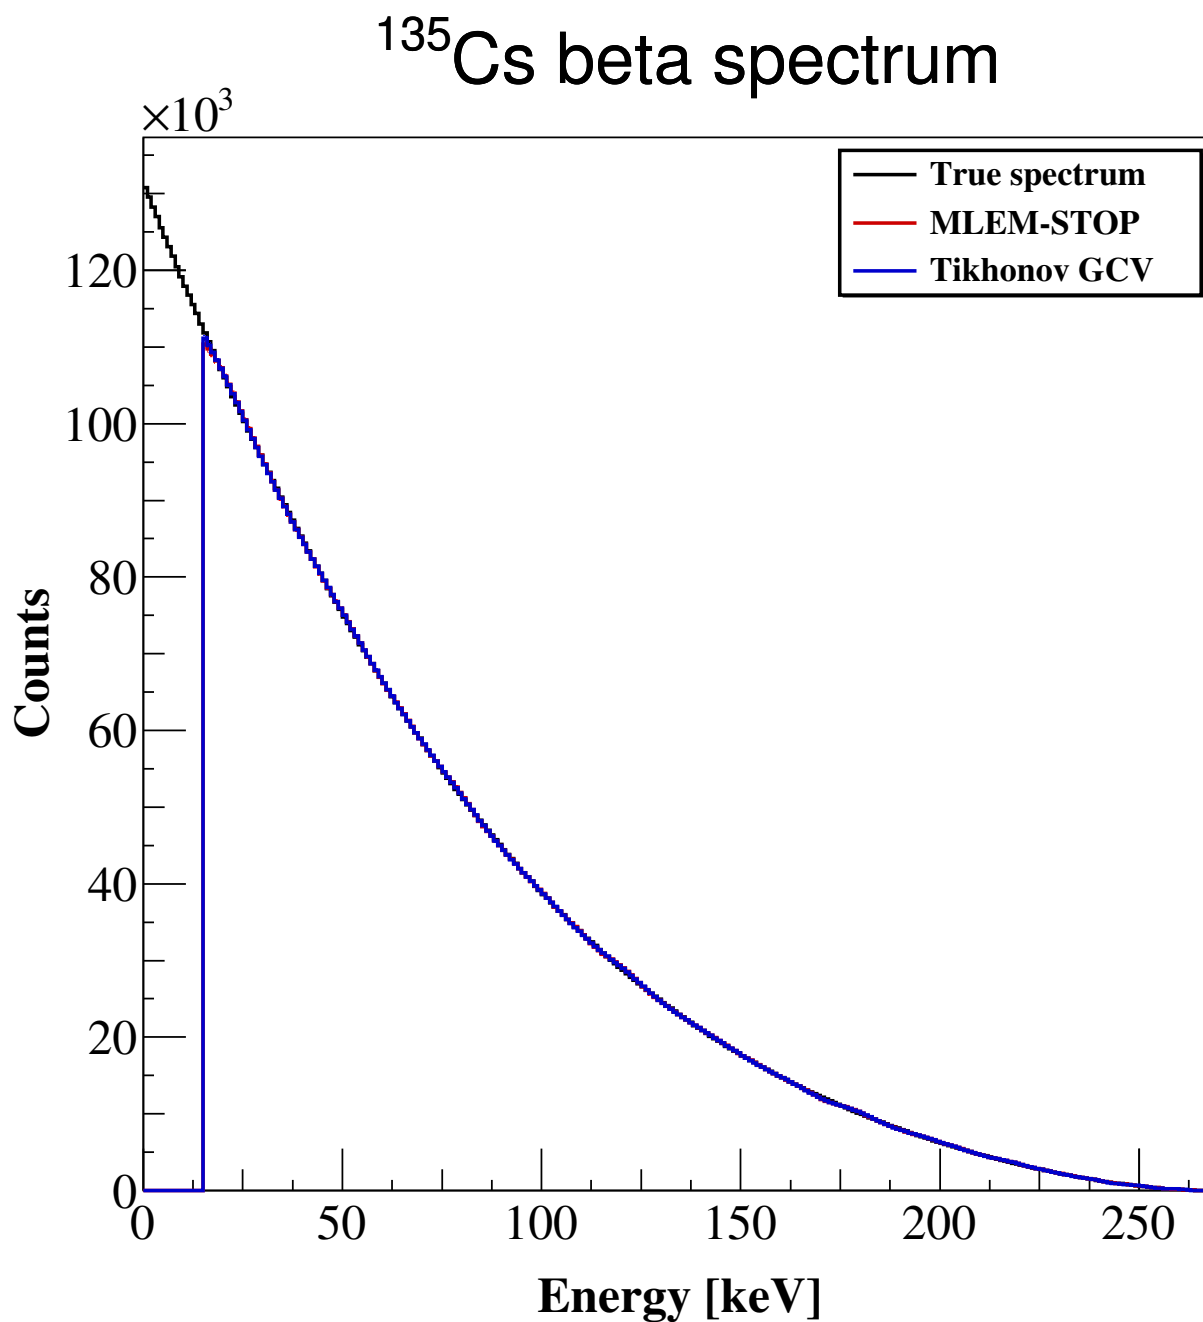

Figure S6: Comparison between the theoretical, true beta spectrum of  $^{135}\text{Cs}$  decay (black) with the MLEM (red) and Tikhonov (blue) unfolded spectra obtained with the MLEM-STOP and the GCV criteria, respectively.

| Beta<br>source    | Counting<br>statistics | $\text{RMSE}_{\min}^{\text{MLEM}}$<br>[reg. param.] | $\text{RMSE}_{\text{stop}}^{\text{MLEM}}$<br>[reg. param.] | $\text{RMSE}_{\min}^{\text{Tik}}$<br>[reg. param.] | $\text{RMSE}_{\text{gcv}}^{\text{Tik}}$<br>[reg. param.] |
|-------------------|------------------------|-----------------------------------------------------|------------------------------------------------------------|----------------------------------------------------|----------------------------------------------------------|
| $^{135}\text{Cs}$ | 6.7e+04                | 12.5 [4]                                            | 12.5 [4]                                                   | 6.5 [4.0e-01]                                      | 8.7 [1.1e-01]                                            |
|                   | 1.7e+05                | 8.2 [4]                                             | 8.2 [4]                                                    | 4.4 [8.6e-02]                                      | 5.2 [4.0e-02]                                            |
|                   | 2.7e+05                | 6.8 [5]                                             | 6.8 [5]                                                    | 4.0 [4.0e-02]                                      | 4.6 [1.9e-02]                                            |
|                   | 3.7e+05                | 6.3 [5]                                             | 6.3 [5]                                                    | 3.7 [2.4e-02]                                      | 4.3 [1.1e-02]                                            |
|                   | 4.7e+05                | 5.3 [6]                                             | 5.4 [5]                                                    | 3.5 [1.4e-02]                                      | 3.6 [1.1e-02]                                            |
|                   | 5.7e+05                | 4.9 [6]                                             | 5.1 [5]                                                    | 3.3 [1.1e-02]                                      | 3.4 [8.6e-03]                                            |
|                   | 6.7e+05                | 5.0 [6]                                             | 5.3 [5]                                                    | 3.2 [8.6e-03]                                      | 3.5 [5.2e-03]                                            |
|                   | 1.7e+06                | 3.4 [8]                                             | 3.7 [6]                                                    | 2.5 [1.9e-03]                                      | 2.5 [1.4e-03]                                            |
|                   | 2.7e+06                | 2.8 [9]                                             | 3.5 [6]                                                    | 2.2 [6.7e-04]                                      | 2.2 [6.7e-04]                                            |
|                   | 3.7e+06                | 2.5 [11]                                            | 2.9 [7]                                                    | 2.0 [3.1e-04]                                      | 2.0 [4.0e-04]                                            |
|                   | 4.7e+06                | 2.5 [11]                                            | 3.0 [7]                                                    | 2.0 [2.4e-04]                                      | 2.0 [2.4e-04]                                            |
|                   | 5.7e+06                | 2.2 [12]                                            | 2.9 [7]                                                    | 1.8 [1.1e-04]                                      | 1.8 [1.9e-04]                                            |
|                   | 6.7e+06                | 2.1 [13]                                            | 2.5 [8]                                                    | 1.7 [8.8e-05]                                      | 1.7 [1.5e-04]                                            |
|                   | 1.7e+07                | 1.5 [17]                                            | 2.1 [9]                                                    | 1.2 [1.5e-05]                                      | 1.3 [2.4e-05]                                            |
|                   | 2.7e+07                | 1.4 [19]                                            | 1.8 [10]                                                   | 1.1 [5.3e-06]                                      | 1.1 [1.1e-05]                                            |
|                   | 3.7e+07                | 1.3 [21]                                            | 1.7 [11]                                                   | 1.0 [3.2e-06]                                      | 1.0 [5.3e-06]                                            |
|                   | 4.7e+07                | 1.2 [22]                                            | 1.5 [12]                                                   | 0.9 [2.5e-06]                                      | 0.9 [3.2e-06]                                            |
|                   | 5.7e+07                | 1.1 [23]                                            | 1.5 [12]                                                   | 0.9 [1.5e-06]                                      | 0.9 [2.5e-06]                                            |
|                   | 6.7e+07                | 1.1 [25]                                            | 1.4 [13]                                                   | 0.8 [1.1e-06]                                      | 0.8 [1.5e-06]                                            |
|                   | 1.7e+08                | 0.9 [33]                                            | 1.1 [17]                                                   | 0.7 [2.5e-07]                                      | 0.7 [2.5e-07]                                            |
|                   | 2.7e+08                | 0.8 [38]                                            | 1.0 [19]                                                   | 0.6 [1.2e-07]                                      | 0.6 [9.0e-08]                                            |
|                   | 3.7e+08                | 0.8 [43]                                            | 0.9 [22]                                                   | 0.6 [6.9e-08]                                      | 0.6 [5.4e-08]                                            |
|                   | 4.7e+08                | 0.7 [47]                                            | 0.8 [24]                                                   | 0.5 [5.4e-08]                                      | 0.6 [3.2e-08]                                            |
|                   | 5.7e+08                | 0.7 [51]                                            | 0.8 [25]                                                   | 0.5 [4.2e-08]                                      | 0.5 [2.5e-08]                                            |

Table S6: Comparison of the four RMSE described in section 3.1 obtained with MLEM and Tikhonov methods on simulated data for  $^{135}\text{Cs}$  beta spectrum. RMSE are normalized by the counting statistics and expressed in pcm. Numbers in brackets are the regularization parameter in each case.

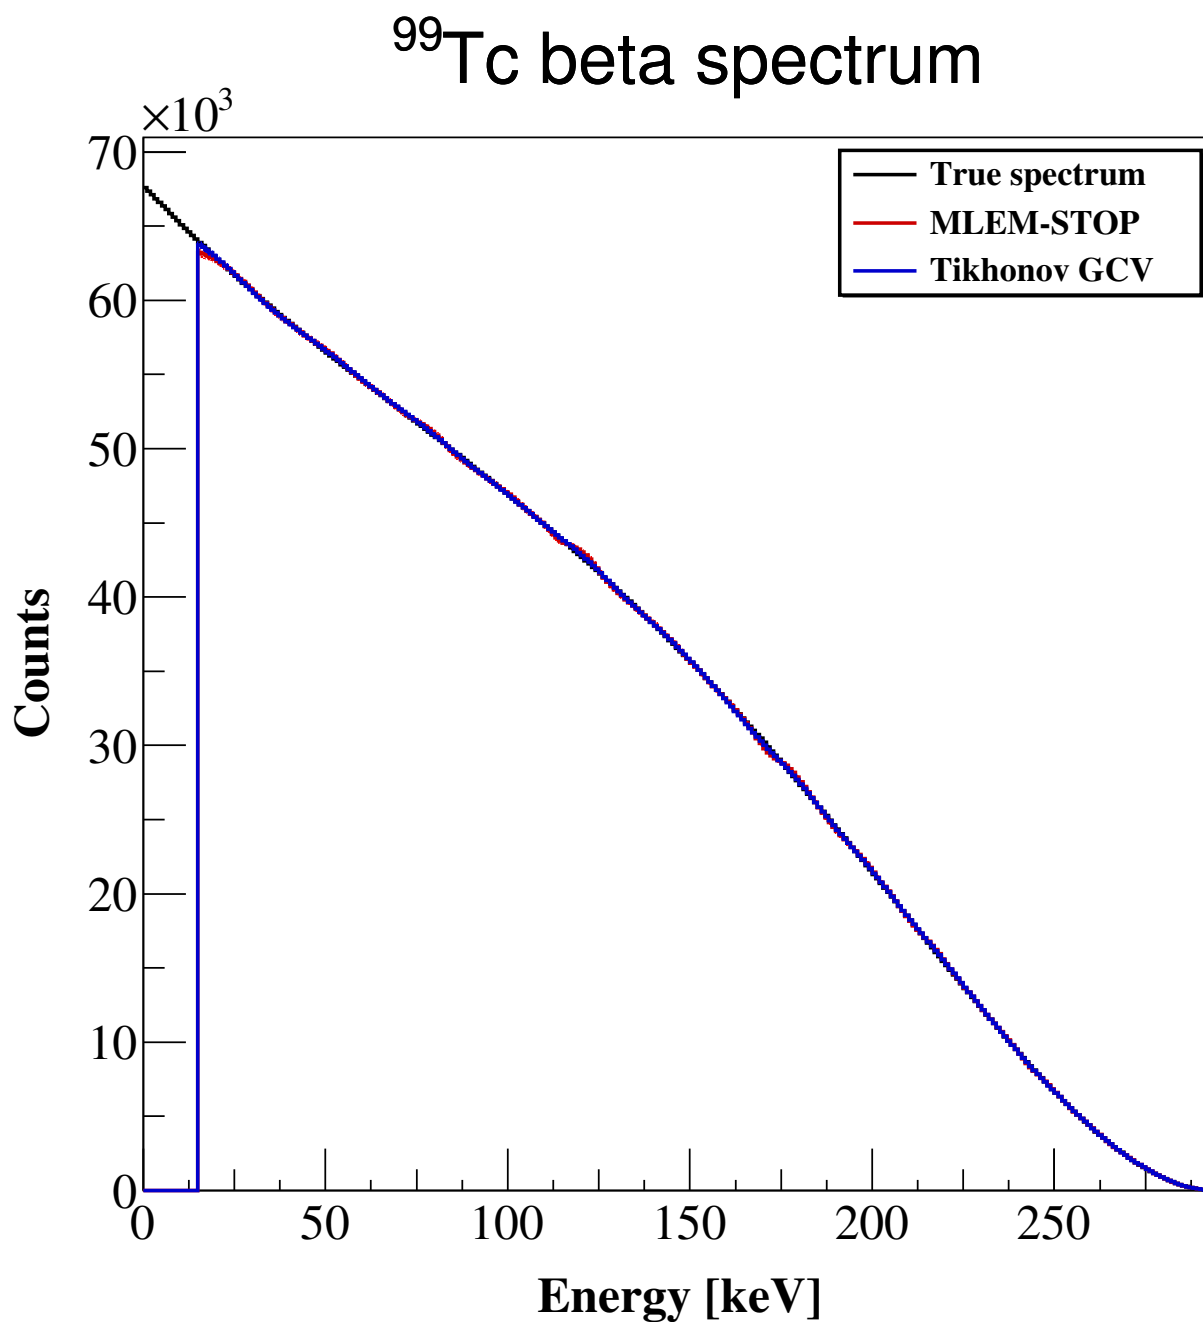

Figure S7: Comparison between the theoretical, true beta spectrum of  $^{99}\text{Tc}$  decay (black) with the MLEM (red) and Tikhonov (blue) unfolded spectra obtained with the MLEM-STOP and the GCV criteria, respectively.

| Beta<br>source   | Counting<br>statistics | $\text{RMSE}_{\min}^{\text{MLEM}}$<br>[reg. param.] | $\text{RMSE}_{\text{stop}}^{\text{MLEM}}$<br>[reg. param.] | $\text{RMSE}_{\min}^{\text{Tik}}$<br>[reg. param.] | $\text{RMSE}_{\text{gcv}}^{\text{Tik}}$<br>[reg. param.] |
|------------------|------------------------|-----------------------------------------------------|------------------------------------------------------------|----------------------------------------------------|----------------------------------------------------------|
| $^{99}\text{Tc}$ | 7.7e+04                | 11.5 [3]                                            | 12.6 [4]                                                   | 5.1 [3.0e+00]                                      | 6.4 [5.0e+01]                                            |
|                  | 1.9e+05                | 8.3 [3]                                             | 8.4 [4]                                                    | 3.4 [6.6e-01]                                      | 4.3 [6.5e+00]                                            |
|                  | 3.1e+05                | 6.6 [4]                                             | 6.6 [4]                                                    | 2.6 [3.1e-01]                                      | 3.7 [3.0e+00]                                            |
|                  | 4.2e+05                | 5.8 [4]                                             | 5.8 [4]                                                    | 2.2 [1.8e-01]                                      | 2.9 [1.1e+00]                                            |
|                  | 5.4e+05                | 5.1 [4]                                             | 5.1 [4]                                                    | 1.9 [1.4e-01]                                      | 2.3 [4.0e-01]                                            |
|                  | 6.5e+05                | 4.4 [4]                                             | 4.4 [4]                                                    | 1.8 [1.1e-01]                                      | 1.9 [1.8e-01]                                            |
|                  | 7.7e+05                | 4.2 [4]                                             | 4.2 [4]                                                    | 1.8 [8.6e-02]                                      | 1.8 [8.6e-02]                                            |
|                  | 1.9e+06                | 3.0 [5]                                             | 3.0 [5]                                                    | 1.2 [1.9e-02]                                      | 1.8 [3.1e-03]                                            |
|                  | 3.1e+06                | 2.4 [6]                                             | 2.4 [5]                                                    | 1.0 [8.6e-03]                                      | 1.2 [4.0e-03]                                            |
|                  | 4.2e+06                | 2.1 [6]                                             | 2.2 [5]                                                    | 0.9 [5.2e-03]                                      | 1.0 [2.4e-03]                                            |
|                  | 5.4e+06                | 1.9 [6]                                             | 1.9 [6]                                                    | 0.9 [4.0e-03]                                      | 0.9 [1.9e-03]                                            |
|                  | 6.5e+06                | 1.7 [7]                                             | 1.8 [6]                                                    | 0.8 [3.1e-03]                                      | 0.9 [1.4e-03]                                            |
|                  | 7.7e+06                | 1.6 [7]                                             | 1.7 [6]                                                    | 0.7 [2.4e-03]                                      | 0.8 [1.1e-03]                                            |
|                  | 1.9e+07                | 1.2 [9]                                             | 1.2 [7]                                                    | 0.6 [5.2e-04]                                      | 0.7 [1.9e-04]                                            |
|                  | 3.1e+07                | 1.0 [10]                                            | 1.1 [7]                                                    | 0.5 [2.4e-04]                                      | 0.5 [1.1e-04]                                            |
|                  | 4.2e+07                | 0.9 [11]                                            | 0.9 [8]                                                    | 0.5 [1.5e-04]                                      | 0.5 [6.8e-05]                                            |
|                  | 5.4e+07                | 0.8 [11]                                            | 0.9 [8]                                                    | 0.4 [8.8e-05]                                      | 0.5 [5.3e-05]                                            |
|                  | 6.5e+07                | 0.7 [12]                                            | 0.9 [8]                                                    | 0.4 [6.8e-05]                                      | 0.4 [3.2e-05]                                            |
|                  | 7.7e+07                | 0.7 [13]                                            | 0.8 [8]                                                    | 0.4 [5.3e-05]                                      | 0.4 [3.2e-05]                                            |
|                  | 1.9e+08                | 0.5 [17]                                            | 0.6 [10]                                                   | 0.3 [8.8e-06]                                      | 0.3 [6.8e-06]                                            |
|                  | 3.1e+08                | 0.4 [19]                                            | 0.5 [11]                                                   | 0.3 [2.5e-06]                                      | 0.3 [3.2e-06]                                            |
|                  | 4.2e+08                | 0.4 [20]                                            | 0.5 [12]                                                   | 0.3 [1.1e-06]                                      | 0.3 [1.9e-06]                                            |
|                  | 5.4e+08                | 0.3 [22]                                            | 0.4 [13]                                                   | 0.2 [6.9e-07]                                      | 0.2 [1.1e-06]                                            |
|                  | 6.5e+08                | 0.3 [23]                                            | 0.4 [13]                                                   | 0.2 [5.3e-07]                                      | 0.2 [8.9e-07]                                            |

Table S7: Comparison of the four RMSE described in section 3.1 obtained with MLEM and Tikhonov methods on simulated data for  $^{99}\text{Tc}$  beta spectrum. RMSE are normalized by the counting statistics and expressed in pcm. Numbers in brackets are the regularization parameter in each case.

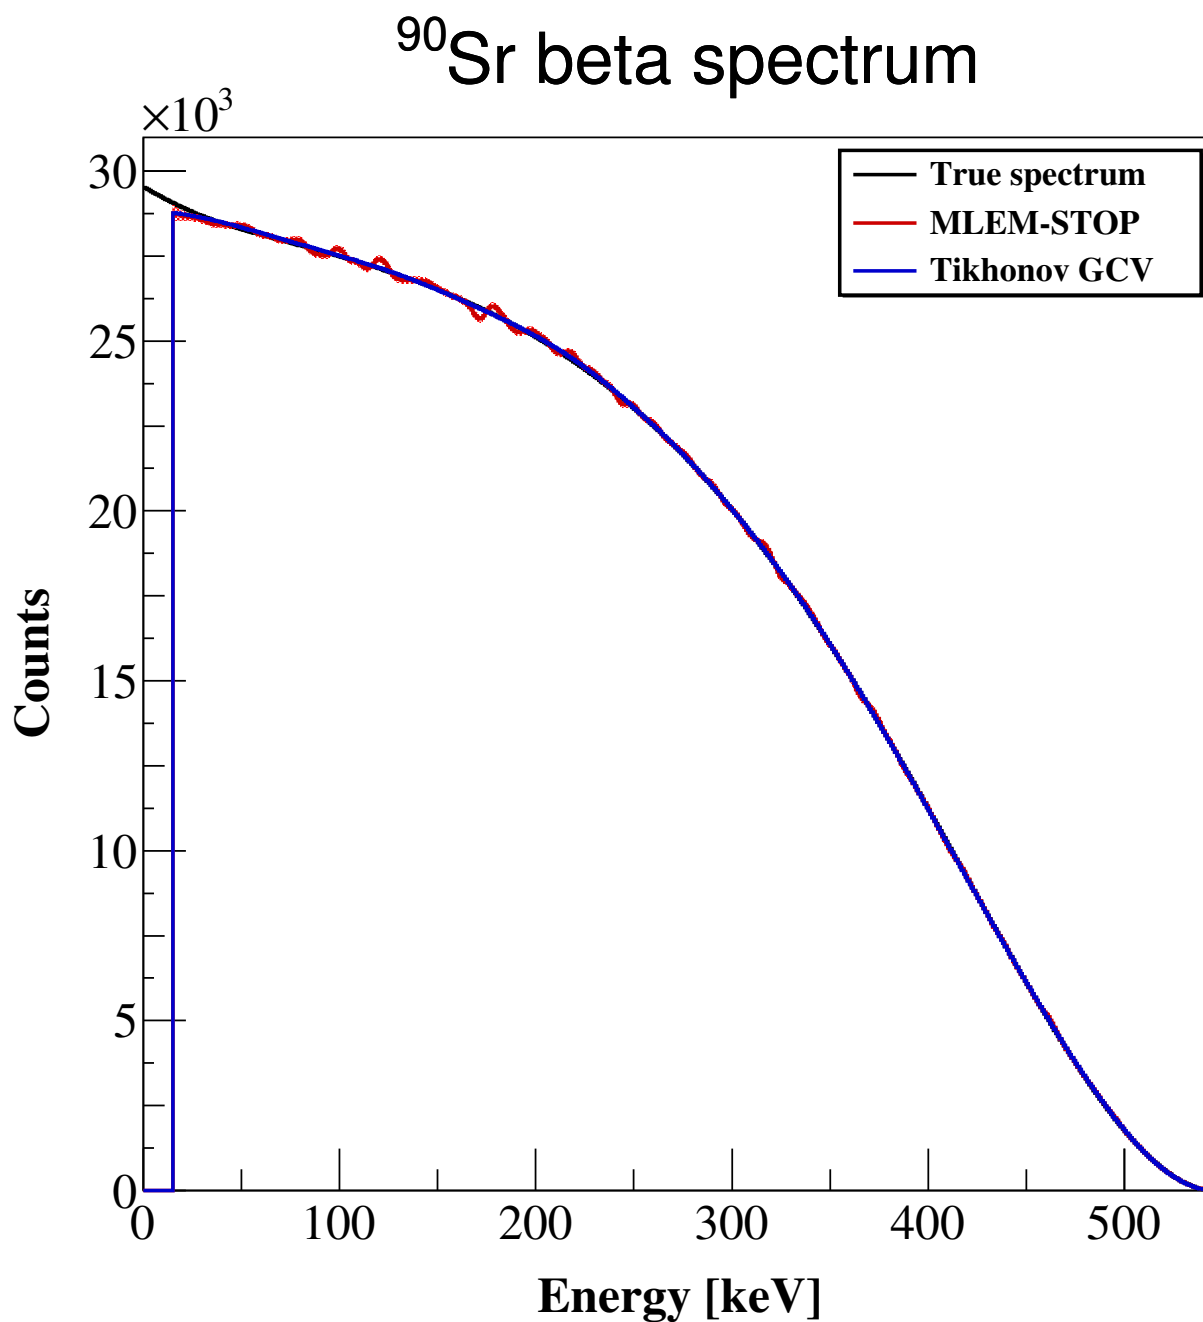

Figure S8: Comparison between the theoretical, true beta spectrum of  $^{90}\text{Sr}$  decay (black) with the MLEM (red) and Tikhonov (blue) unfolded spectra obtained with the MLEM-STOP and the GCV criteria, respectively.



| Beta<br>source   | Counting<br>statistics | $\text{RMSE}_{\min}^{\text{MLEM}}$<br>[reg. param.] | $\text{RMSE}_{\text{stop}}^{\text{MLEM}}$<br>[reg. param.] | $\text{RMSE}_{\min}^{\text{Tik}}$<br>[reg. param.] | $\text{RMSE}_{\text{gcv}}^{\text{Tik}}$<br>[reg. param.] |
|------------------|------------------------|-----------------------------------------------------|------------------------------------------------------------|----------------------------------------------------|----------------------------------------------------------|
| $^{90}\text{Sr}$ | 8.4e+04                | 8.3 [3]                                             | 8.3 [3]                                                    | 1.5 [1.4e+03]                                      | 1.6 [2.3e+03]                                            |
|                  | 2.1e+05                | 5.2 [3]                                             | 5.5 [4]                                                    | 1.1 [3.9e+02]                                      | 1.2 [6.5e+02]                                            |
|                  | 3.3e+05                | 4.4 [3]                                             | 4.6 [4]                                                    | 1.0 [1.8e+02]                                      | 1.1 [3.9e+02]                                            |
|                  | 4.6e+05                | 3.8 [4]                                             | 3.8 [4]                                                    | 1.0 [1.4e+02]                                      | 1.0 [2.3e+02]                                            |
|                  | 5.8e+05                | 3.4 [4]                                             | 3.4 [4]                                                    | 0.9 [5.0e+01]                                      | 1.0 [1.8e+02]                                            |
|                  | 7.1e+05                | 3.1 [4]                                             | 3.1 [4]                                                    | 0.8 [3.0e+01]                                      | 0.8 [1.1e+02]                                            |
|                  | 8.3e+05                | 2.8 [4]                                             | 2.8 [4]                                                    | 0.8 [1.8e+01]                                      | 0.9 [8.4e+01]                                            |
|                  | 2.1e+06                | 2.0 [4]                                             | 2.0 [5]                                                    | 0.6 [1.8e+00]                                      | 0.7 [1.8e+01]                                            |
|                  | 3.3e+06                | 1.5 [5]                                             | 1.5 [5]                                                    | 0.5 [6.6e-01]                                      | 0.6 [5.1e+00]                                            |
|                  | 4.6e+06                | 1.3 [5]                                             | 1.3 [5]                                                    | 0.5 [2.4e-01]                                      | 0.5 [2.4e+00]                                            |
|                  | 5.8e+06                | 1.2 [5]                                             | 1.2 [5]                                                    | 0.4 [1.1e-01]                                      | 0.5 [1.4e+00]                                            |
|                  | 7.1e+06                | 1.2 [5]                                             | 1.2 [5]                                                    | 0.4 [5.1e-02]                                      | 0.5 [8.5e-01]                                            |
|                  | 8.3e+06                | 1.0 [6]                                             | 1.1 [5]                                                    | 0.4 [5.1e-02]                                      | 0.4 [6.6e-01]                                            |
|                  | 2.1e+07                | 0.7 [6]                                             | 0.7 [6]                                                    | 0.3 [8.6e-03]                                      | 0.3 [8.6e-02]                                            |
|                  | 3.3e+07                | 0.6 [7]                                             | 0.6 [6]                                                    | 0.2 [4.0e-03]                                      | 0.3 [3.1e-02]                                            |
|                  | 4.6e+07                | 0.5 [7]                                             | 0.5 [7]                                                    | 0.2 [2.4e-03]                                      | 0.2 [1.1e-02]                                            |
|                  | 5.8e+07                | 0.4 [8]                                             | 0.4 [7]                                                    | 0.2 [1.9e-03]                                      | 0.2 [5.2e-03]                                            |
|                  | 7.1e+07                | 0.4 [8]                                             | 0.4 [7]                                                    | 0.2 [1.1e-03]                                      | 0.2 [3.1e-03]                                            |
|                  | 8.3e+07                | 0.4 [8]                                             | 0.4 [7]                                                    | 0.1 [8.7e-04]                                      | 0.1 [1.9e-03]                                            |
|                  | 2.1e+08                | 0.3 [9]                                             | 0.3 [8]                                                    | 0.1 [1.9e-04]                                      | 0.1 [2.4e-04]                                            |
|                  | 3.3e+08                | 0.2 [10]                                            | 0.2 [8]                                                    | 0.1 [8.8e-05]                                      | 0.1 [6.8e-05]                                            |
|                  | 4.6e+08                | 0.2 [11]                                            | 0.2 [9]                                                    | 0.1 [5.3e-05]                                      | 0.1 [4.1e-05]                                            |
|                  | 5.8e+08                | 0.2 [11]                                            | 0.2 [9]                                                    | 0.1 [4.1e-05]                                      | 0.1 [2.4e-05]                                            |
|                  | 7.1e+08                | 0.2 [12]                                            | 0.2 [9]                                                    | 0.1 [3.2e-05]                                      | 0.1 [1.9e-05]                                            |

Table S8: Comparison of the four RMSE described in section 3.1 obtained with MLEM and Tikhonov methods on simulated data for  $^{90}\text{Sr}$  beta spectrum. RMSE are normalized by the counting statistics and expressed in pcm. Numbers in brackets are the regularization parameter in each case.

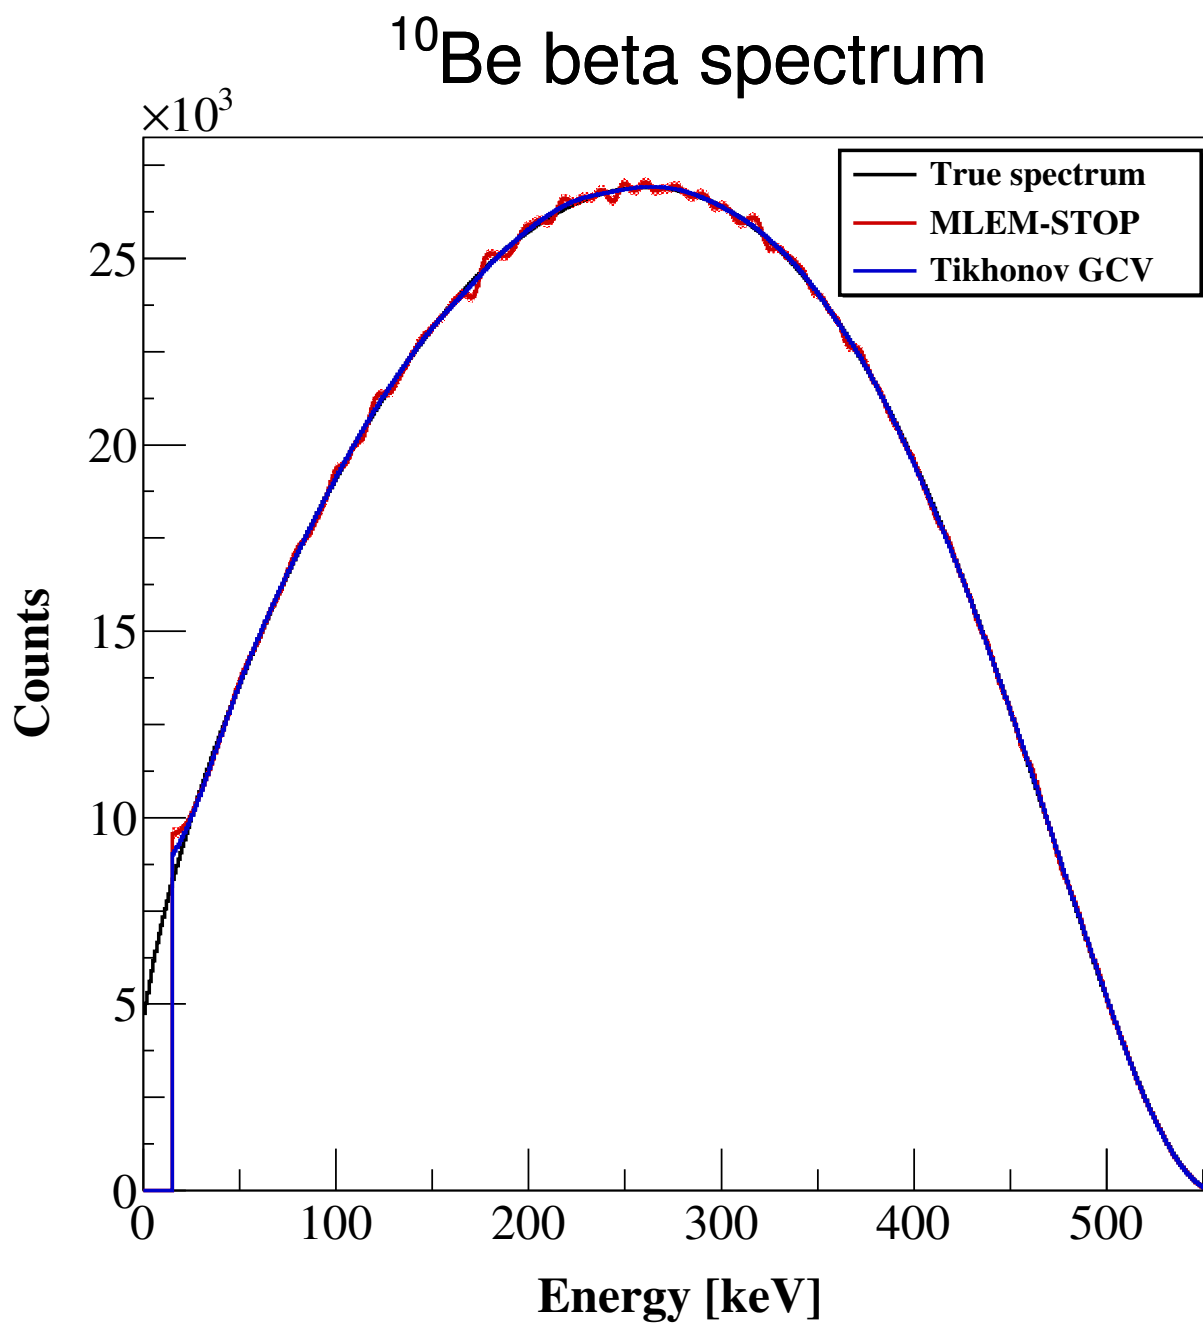

Figure S9: Comparison between the theoretical, true beta spectrum of  $^{10}\text{Be}$  decay (black) with the MLEM (red) and Tikhonov (blue) unfolded spectra obtained with the MLEM-STOP and the GCV criteria, respectively.

| Beta<br>source   | Counting<br>statistics | $\text{RMSE}_{\min}^{\text{MLEM}}$<br>[reg. param.] | $\text{RMSE}_{\text{stop}}^{\text{MLEM}}$<br>[reg. param.] | $\text{RMSE}_{\min}^{\text{Tik}}$<br>[reg. param.] | $\text{RMSE}_{\text{gcv}}^{\text{Tik}}$<br>[reg. param.] |
|------------------|------------------------|-----------------------------------------------------|------------------------------------------------------------|----------------------------------------------------|----------------------------------------------------------|
| $^{10}\text{Be}$ | 8.7e+04                | 8.6 [3]                                             | 9.0 [4]                                                    | 2.9 [8.4e+01]                                      | 2.9 [1.1e+02]                                            |
|                  | 2.2e+05                | 6.2 [4]                                             | 6.2 [4]                                                    | 2.0 [1.1e+01]                                      | 2.1 [1.8e+01]                                            |
|                  | 3.5e+05                | 5.2 [5]                                             | 5.2 [5]                                                    | 1.8 [3.9e+00]                                      | 1.8 [8.5e+00]                                            |
|                  | 4.8e+05                | 4.7 [5]                                             | 4.7 [5]                                                    | 1.5 [2.4e+00]                                      | 1.6 [5.1e+00]                                            |
|                  | 6.1e+05                | 4.2 [6]                                             | 4.2 [5]                                                    | 1.4 [1.4e+00]                                      | 1.4 [3.0e+00]                                            |
|                  | 7.4e+05                | 3.9 [6]                                             | 4.0 [5]                                                    | 1.3 [6.6e-01]                                      | 1.4 [2.4e+00]                                            |
|                  | 8.7e+05                | 3.7 [6]                                             | 3.8 [5]                                                    | 1.2 [6.6e-01]                                      | 1.3 [1.8e+00]                                            |
|                  | 2.2e+06                | 2.6 [8]                                             | 2.7 [7]                                                    | 1.0 [8.6e-02]                                      | 1.1 [4.0e-01]                                            |
|                  | 3.5e+06                | 2.2 [10]                                            | 2.3 [7]                                                    | 0.8 [3.1e-02]                                      | 0.9 [1.4e-01]                                            |
|                  | 4.8e+06                | 1.9 [11]                                            | 2.0 [8]                                                    | 0.8 [1.9e-02]                                      | 0.8 [8.6e-02]                                            |
|                  | 6.1e+06                | 1.8 [11]                                            | 1.9 [8]                                                    | 0.7 [1.1e-02]                                      | 0.8 [5.1e-02]                                            |
|                  | 7.4e+06                | 1.6 [12]                                            | 1.8 [8]                                                    | 0.6 [6.7e-03]                                      | 0.7 [4.0e-02]                                            |
|                  | 8.7e+06                | 1.5 [13]                                            | 1.6 [9]                                                    | 0.6 [5.2e-03]                                      | 0.7 [3.1e-02]                                            |
|                  | 2.2e+07                | 1.1 [16]                                            | 1.2 [10]                                                   | 0.4 [8.7e-04]                                      | 0.5 [4.0e-03]                                            |
|                  | 3.5e+07                | 0.9 [18]                                            | 1.0 [11]                                                   | 0.4 [3.1e-04]                                      | 0.4 [1.4e-03]                                            |
|                  | 4.8e+07                | 0.8 [20]                                            | 0.9 [12]                                                   | 0.3 [1.9e-04]                                      | 0.4 [6.7e-04]                                            |
|                  | 6.1e+07                | 0.7 [21]                                            | 0.8 [13]                                                   | 0.3 [1.1e-04]                                      | 0.3 [4.0e-04]                                            |
|                  | 7.4e+07                | 0.6 [22]                                            | 0.7 [14]                                                   | 0.3 [8.8e-05]                                      | 0.3 [3.1e-04]                                            |
|                  | 8.7e+07                | 0.6 [23]                                            | 0.7 [14]                                                   | 0.3 [6.8e-05]                                      | 0.3 [1.5e-04]                                            |
|                  | 2.2e+08                | 0.4 [30]                                            | 0.5 [17]                                                   | 0.2 [1.1e-05]                                      | 0.2 [3.2e-05]                                            |
|                  | 3.5e+08                | 0.4 [33]                                            | 0.4 [19]                                                   | 0.2 [5.3e-06]                                      | 0.2 [1.1e-05]                                            |
|                  | 4.8e+08                | 0.3 [36]                                            | 0.4 [21]                                                   | 0.2 [2.5e-06]                                      | 0.2 [6.8e-06]                                            |
|                  | 6.1e+08                | 0.3 [38]                                            | 0.3 [22]                                                   | 0.1 [1.9e-06]                                      | 0.1 [4.1e-06]                                            |
|                  | 7.4e+08                | 0.3 [40]                                            | 0.3 [23]                                                   | 0.1 [1.1e-06]                                      | 0.1 [3.2e-06]                                            |

Table S9: Comparison of the four RMSE described in section 3.1 obtained with MLEM and Tikhonov methods on simulated data for  $^{10}\text{Be}$  beta spectrum. RMSE are normalized by the counting statistics and expressed in pcm. Numbers in brackets are the regularization parameter in each case.

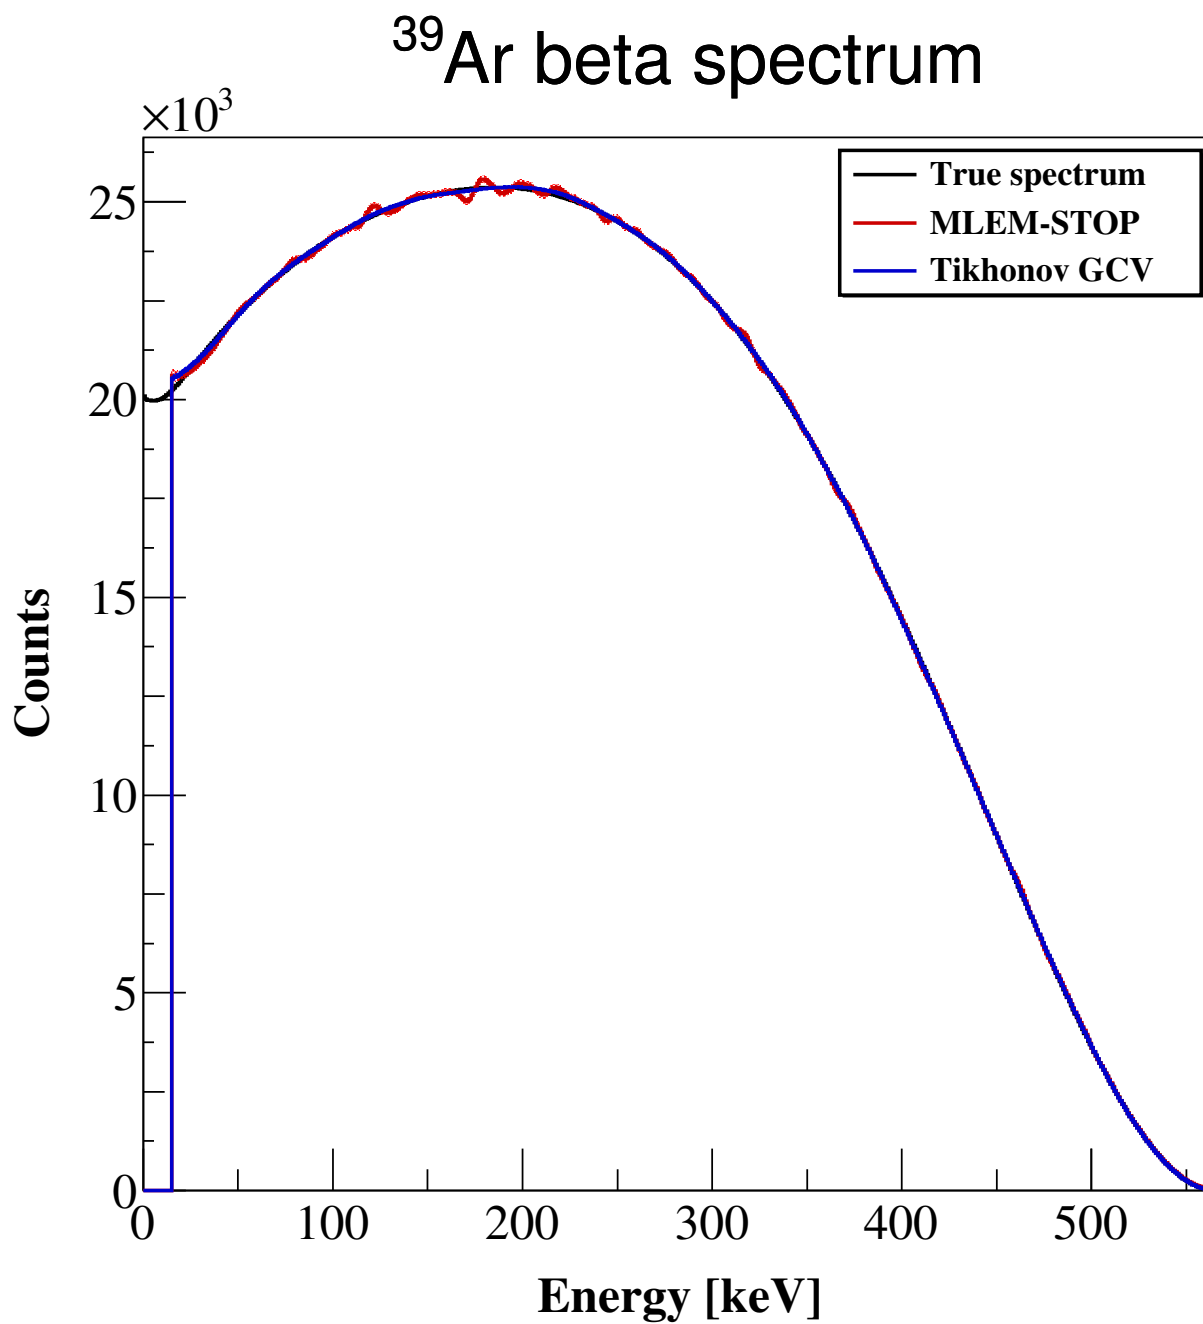

Figure S10: Comparison between the theoretical, true beta spectrum of  $^{39}\text{Ar}$  decay (black) with the MLEM (red) and Tikhonov (blue) unfolded spectra obtained with the MLEM-STOP and the GCV criteria, respectively.

| Beta<br>source   | Counting<br>statistics | $\text{RMSE}_{\min}^{\text{MLEM}}$<br>[reg. param.] | $\text{RMSE}_{\text{stop}}^{\text{MLEM}}$<br>[reg. param.] | $\text{RMSE}_{\min}^{\text{Tik}}$<br>[reg. param.] | $\text{RMSE}_{\text{gcv}}^{\text{Tik}}$<br>[reg. param.] |
|------------------|------------------------|-----------------------------------------------------|------------------------------------------------------------|----------------------------------------------------|----------------------------------------------------------|
| $^{39}\text{Ar}$ | 8.5e+04                | 6.6 [2]                                             | 7.1 [3]                                                    | 2.1 [2.3e+02]                                      | 2.1 [3.0e+02]                                            |
|                  | 2.1e+05                | 4.5 [3]                                             | 4.5 [3]                                                    | 1.3 [3.0e+01]                                      | 1.4 [8.4e+01]                                            |
|                  | 3.4e+05                | 3.7 [3]                                             | 4.1 [4]                                                    | 1.2 [1.8e+01]                                      | 1.3 [3.0e+01]                                            |
|                  | 4.7e+05                | 3.3 [3]                                             | 3.7 [4]                                                    | 1.0 [8.5e+00]                                      | 1.1 [1.8e+01]                                            |
|                  | 5.9e+05                | 2.8 [3]                                             | 3.1 [4]                                                    | 1.0 [5.1e+00]                                      | 1.0 [1.1e+01]                                            |
|                  | 7.2e+05                | 2.7 [3]                                             | 3.0 [4]                                                    | 0.9 [5.1e+00]                                      | 0.9 [8.5e+00]                                            |
|                  | 8.5e+05                | 2.5 [3]                                             | 2.8 [4]                                                    | 0.9 [3.9e+00]                                      | 0.9 [6.5e+00]                                            |
|                  | 2.1e+06                | 1.7 [3]                                             | 1.8 [4]                                                    | 0.6 [6.6e-01]                                      | 0.6 [1.1e+00]                                            |
|                  | 3.4e+06                | 1.4 [3]                                             | 1.4 [4]                                                    | 0.5 [2.4e-01]                                      | 0.6 [5.1e-01]                                            |
|                  | 4.7e+06                | 1.2 [4]                                             | 1.2 [4]                                                    | 0.5 [1.4e-01]                                      | 0.5 [3.1e-01]                                            |
|                  | 5.9e+06                | 1.1 [4]                                             | 1.1 [4]                                                    | 0.5 [8.6e-02]                                      | 0.5 [1.8e-01]                                            |
|                  | 7.2e+06                | 1.0 [4]                                             | 1.0 [4]                                                    | 0.4 [6.6e-02]                                      | 0.4 [1.4e-01]                                            |
|                  | 8.5e+06                | 0.9 [4]                                             | 0.9 [4]                                                    | 0.4 [5.1e-02]                                      | 0.4 [1.1e-01]                                            |
|                  | 2.1e+07                | 0.7 [4]                                             | 0.7 [5]                                                    | 0.3 [8.6e-03]                                      | 0.3 [2.4e-02]                                            |
|                  | 3.4e+07                | 0.6 [4]                                             | 0.6 [5]                                                    | 0.3 [3.1e-03]                                      | 0.3 [1.1e-02]                                            |
|                  | 4.7e+07                | 0.5 [5]                                             | 0.5 [5]                                                    | 0.2 [1.9e-03]                                      | 0.3 [5.2e-03]                                            |
|                  | 5.9e+07                | 0.4 [5]                                             | 0.4 [5]                                                    | 0.2 [1.1e-03]                                      | 0.2 [4.0e-03]                                            |
|                  | 7.2e+07                | 0.4 [5]                                             | 0.4 [5]                                                    | 0.2 [8.7e-04]                                      | 0.2 [2.4e-03]                                            |
|                  | 8.5e+07                | 0.4 [6]                                             | 0.4 [5]                                                    | 0.2 [5.2e-04]                                      | 0.2 [1.9e-03]                                            |
|                  | 2.1e+08                | 0.3 [8]                                             | 0.3 [6]                                                    | 0.1 [1.1e-04]                                      | 0.1 [3.1e-04]                                            |
|                  | 3.4e+08                | 0.2 [10]                                            | 0.3 [6]                                                    | 0.1 [4.1e-05]                                      | 0.1 [1.1e-04]                                            |
|                  | 4.7e+08                | 0.2 [11]                                            | 0.2 [6]                                                    | 0.1 [2.4e-05]                                      | 0.1 [6.8e-05]                                            |
|                  | 5.9e+08                | 0.2 [12]                                            | 0.2 [7]                                                    | 0.1 [1.5e-05]                                      | 0.1 [4.1e-05]                                            |
|                  | 7.2e+08                | 0.2 [13]                                            | 0.2 [7]                                                    | 0.1 [1.1e-05]                                      | 0.1 [2.4e-05]                                            |

Table S10: Comparison of the four RMSE described in section 3.1 obtained with MLEM and Tikhonov methods on simulated data for  $^{39}\text{Ar}$  beta spectrum. RMSE are normalized by the counting statistics and expressed in pcm. Numbers in brackets are the regularization parameter in each case.

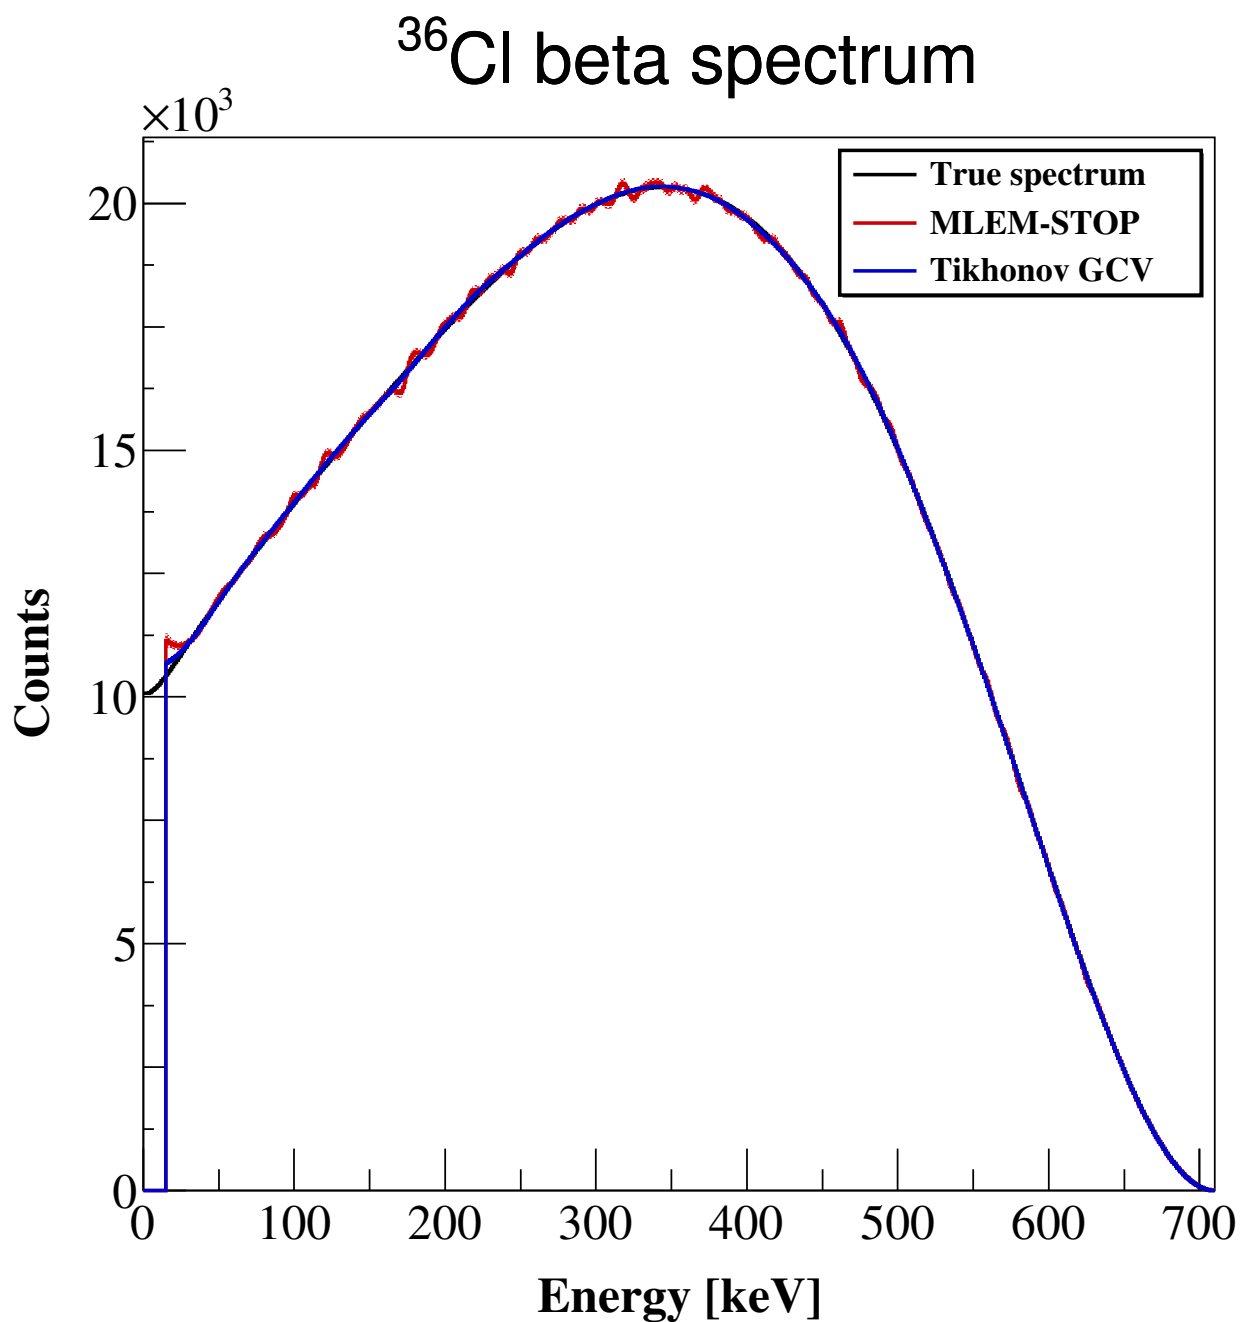

Figure S11: Comparison between the theoretical, true beta spectrum of  $^{36}\text{Cl}$  decay (black) with the MLEM (red) and Tikhonov (blue) unfolded spectra obtained with the MLEM-STOP and the GCV criteria, respectively.

| Beta<br>source   | Counting<br>statistics | $\text{RMSE}_{\min}^{\text{MLEM}}$<br>[reg. param.] | $\text{RMSE}_{\text{stop}}^{\text{MLEM}}$<br>[reg. param.] | $\text{RMSE}_{\min}^{\text{Tik}}$<br>[reg. param.] | $\text{RMSE}_{\text{gcv}}^{\text{Tik}}$<br>[reg. param.] |
|------------------|------------------------|-----------------------------------------------------|------------------------------------------------------------|----------------------------------------------------|----------------------------------------------------------|
| $^{36}\text{Cl}$ | 8.7e+04                | 6.4 [2]                                             | 6.4 [3]                                                    | 2.1 [6.5e+02]                                      | 2.1 [6.5e+02]                                            |
|                  | 2.2e+05                | 4.3 [3]                                             | 4.6 [4]                                                    | 1.3 [1.1e+02]                                      | 1.3 [1.4e+02]                                            |
|                  | 3.5e+05                | 3.6 [3]                                             | 3.7 [4]                                                    | 1.1 [5.0e+01]                                      | 1.1 [6.5e+01]                                            |
|                  | 4.8e+05                | 3.2 [4]                                             | 3.2 [4]                                                    | 1.0 [3.0e+01]                                      | 1.0 [3.9e+01]                                            |
|                  | 6.1e+05                | 3.0 [4]                                             | 3.0 [4]                                                    | 0.9 [1.4e+01]                                      | 0.9 [3.0e+01]                                            |
|                  | 7.4e+05                | 2.7 [4]                                             | 2.7 [4]                                                    | 0.8 [1.1e+01]                                      | 0.8 [1.8e+01]                                            |
|                  | 8.7e+05                | 2.6 [4]                                             | 2.6 [4]                                                    | 0.8 [8.5e+00]                                      | 0.8 [1.4e+01]                                            |
|                  | 2.2e+06                | 1.8 [5]                                             | 1.8 [5]                                                    | 0.6 [1.4e+00]                                      | 0.6 [3.0e+00]                                            |
|                  | 3.5e+06                | 1.6 [6]                                             | 1.6 [5]                                                    | 0.6 [6.6e-01]                                      | 0.6 [1.4e+00]                                            |
|                  | 4.8e+06                | 1.4 [6]                                             | 1.4 [6]                                                    | 0.5 [4.0e-01]                                      | 0.5 [6.6e-01]                                            |
|                  | 6.1e+06                | 1.3 [7]                                             | 1.3 [6]                                                    | 0.5 [1.8e-01]                                      | 0.5 [5.1e-01]                                            |
|                  | 7.4e+06                | 1.2 [7]                                             | 1.2 [6]                                                    | 0.5 [1.4e-01]                                      | 0.5 [4.0e-01]                                            |
|                  | 8.6e+06                | 1.1 [7]                                             | 1.1 [6]                                                    | 0.4 [1.1e-01]                                      | 0.5 [2.4e-01]                                            |
|                  | 2.2e+07                | 0.8 [9]                                             | 0.8 [7]                                                    | 0.4 [1.9e-02]                                      | 0.4 [5.1e-02]                                            |
|                  | 3.5e+07                | 0.7 [10]                                            | 0.7 [8]                                                    | 0.4 [6.7e-03]                                      | 0.4 [2.4e-02]                                            |
|                  | 4.8e+07                | 0.6 [11]                                            | 0.6 [8]                                                    | 0.4 [4.0e-03]                                      | 0.4 [1.4e-02]                                            |
|                  | 6.1e+07                | 0.6 [12]                                            | 0.6 [9]                                                    | 0.3 [2.4e-03]                                      | 0.4 [8.6e-03]                                            |
|                  | 7.4e+07                | 0.5 [12]                                            | 0.6 [9]                                                    | 0.3 [1.4e-03]                                      | 0.4 [6.7e-03]                                            |
|                  | 8.6e+07                | 0.5 [13]                                            | 0.5 [9]                                                    | 0.3 [1.1e-03]                                      | 0.3 [4.0e-03]                                            |
|                  | 2.2e+08                | 0.4 [16]                                            | 0.4 [11]                                                   | 0.3 [1.9e-04]                                      | 0.3 [8.7e-04]                                            |
|                  | 3.5e+08                | 0.4 [18]                                            | 0.4 [12]                                                   | 0.3 [6.8e-05]                                      | 0.3 [3.1e-04]                                            |
|                  | 4.8e+08                | 0.4 [19]                                            | 0.4 [13]                                                   | 0.3 [4.1e-05]                                      | 0.3 [1.9e-04]                                            |
|                  | 6.1e+08                | 0.3 [20]                                            | 0.4 [13]                                                   | 0.3 [2.4e-05]                                      | 0.3 [1.1e-04]                                            |
|                  | 7.3e+08                | 0.3 [21]                                            | 0.4 [13]                                                   | 0.3 [1.9e-05]                                      | 0.3 [6.8e-05]                                            |

Table S11: Comparison of the four RMSE described in section 3.1 obtained with MLEM and Tikhonov methods on simulated data for  $^{36}\text{Cl}$  beta spectrum. RMSE are normalized by the counting statistics and expressed in pcm. Numbers in brackets are the regularization parameter in each case.

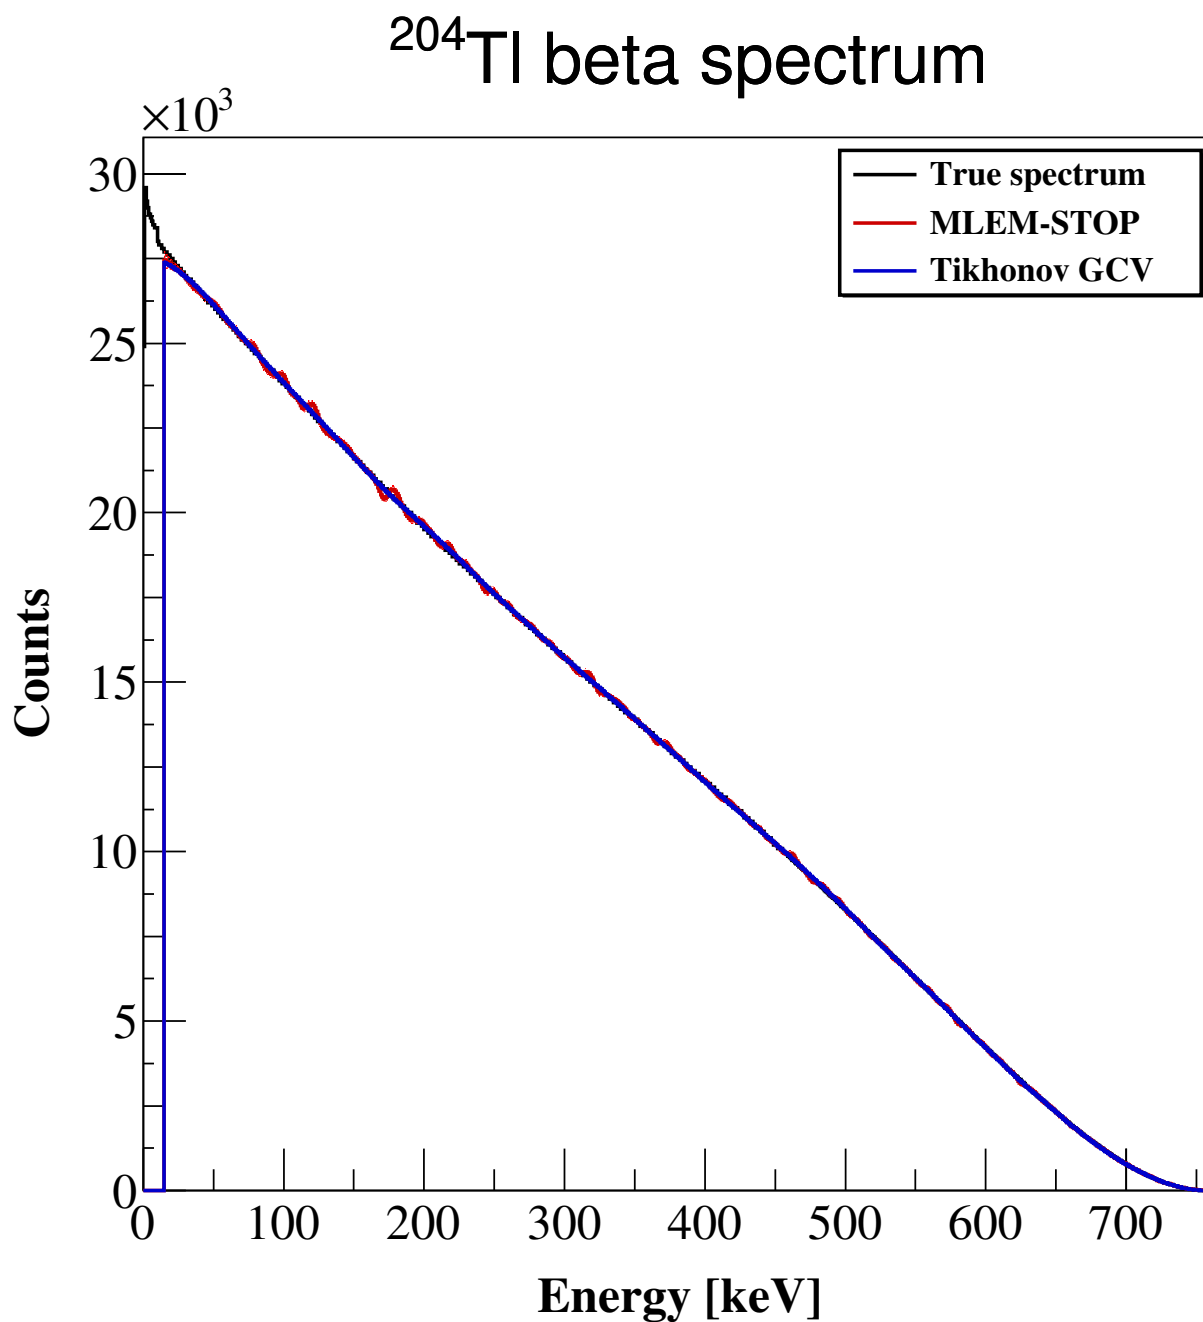

Figure S12: Comparison between the theoretical, true beta spectrum of  $^{204}\text{Tl}$  decay (black) with the MLEM (red) and Tikhonov (blue) unfolded spectra obtained with the MLEM-STOP and the GCV criteria, respectively.



| Beta<br>source    | Counting<br>statistics | RMSE <sup>MLEM</sup> <sub>min</sub><br>[reg. param.] | RMSE <sup>MLEM</sup> <sub>stop</sub><br>[reg. param.] | RMSE <sup>Tik</sup> <sub>min</sub><br>[reg. param.] | RMSE <sup>Tik</sup> <sub>gcv</sub><br>[reg. param.] |
|-------------------|------------------------|------------------------------------------------------|-------------------------------------------------------|-----------------------------------------------------|-----------------------------------------------------|
| <sup>204</sup> Tl | 8.2e+04                | 6.6 [3]                                              | 6.9 [4]                                               | 2.2 [6.5e+02]                                       | 2.2 [1.1e+03]                                       |
|                   | 2.1e+05                | 4.8 [4]                                              | 4.8 [4]                                               | 1.5 [1.1e+02]                                       | 1.6 [3.0e+02]                                       |
|                   | 3.3e+05                | 3.6 [4]                                              | 3.6 [4]                                               | 1.1 [3.0e+01]                                       | 1.2 [1.1e+02]                                       |
|                   | 4.5e+05                | 3.3 [4]                                              | 3.3 [4]                                               | 1.1 [1.4e+01]                                       | 1.3 [6.5e+01]                                       |
|                   | 5.7e+05                | 2.9 [4]                                              | 3.0 [5]                                               | 1.0 [1.1e+01]                                       | 1.1 [3.9e+01]                                       |
|                   | 7.0e+05                | 2.7 [4]                                              | 2.7 [5]                                               | 1.0 [6.5e+00]                                       | 1.1 [3.0e+01]                                       |
|                   | 8.2e+05                | 2.5 [5]                                              | 2.5 [5]                                               | 0.9 [5.1e+00]                                       | 1.0 [1.8e+01]                                       |
|                   | 2.0e+06                | 1.7 [5]                                              | 1.7 [5]                                               | 0.7 [4.0e-01]                                       | 0.8 [3.0e+00]                                       |
|                   | 3.3e+06                | 1.4 [6]                                              | 1.4 [6]                                               | 0.6 [1.4e-01]                                       | 0.7 [1.4e+00]                                       |
|                   | 4.5e+06                | 1.2 [6]                                              | 1.2 [6]                                               | 0.5 [6.6e-02]                                       | 0.6 [6.6e-01]                                       |
|                   | 5.7e+06                | 1.1 [6]                                              | 1.1 [6]                                               | 0.5 [5.1e-02]                                       | 0.6 [5.1e-01]                                       |
|                   | 7.0e+06                | 1.0 [6]                                              | 1.0 [6]                                               | 0.5 [3.1e-02]                                       | 0.5 [3.1e-01]                                       |
|                   | 8.2e+06                | 1.0 [6]                                              | 1.0 [6]                                               | 0.4 [2.4e-02]                                       | 0.5 [2.4e-01]                                       |
|                   | 2.0e+07                | 0.7 [7]                                              | 0.7 [7]                                               | 0.4 [5.2e-03]                                       | 0.4 [2.4e-02]                                       |
|                   | 3.3e+07                | 0.6 [8]                                              | 0.6 [7]                                               | 0.3 [2.4e-03]                                       | 0.3 [6.7e-03]                                       |
|                   | 4.5e+07                | 0.5 [8]                                              | 0.5 [7]                                               | 0.3 [1.4e-03]                                       | 0.3 [3.1e-03]                                       |
|                   | 5.7e+07                | 0.5 [9]                                              | 0.5 [8]                                               | 0.3 [1.1e-03]                                       | 0.3 [1.9e-03]                                       |
|                   | 7.0e+07                | 0.4 [9]                                              | 0.5 [8]                                               | 0.3 [8.7e-04]                                       | 0.3 [1.1e-03]                                       |
|                   | 8.2e+07                | 0.4 [9]                                              | 0.4 [8]                                               | 0.3 [6.7e-04]                                       | 0.3 [8.7e-04]                                       |
|                   | 2.0e+08                | 0.4 [11]                                             | 0.4 [9]                                               | 0.3 [1.5e-04]                                       | 0.3 [1.1e-04]                                       |
|                   | 3.3e+08                | 0.3 [12]                                             | 0.3 [9]                                               | 0.3 [5.3e-05]                                       | 0.3 [5.3e-05]                                       |
|                   | 4.5e+08                | 0.3 [13]                                             | 0.3 [10]                                              | 0.3 [3.2e-05]                                       | 0.3 [3.2e-05]                                       |
|                   | 5.7e+08                | 0.3 [13]                                             | 0.3 [10]                                              | 0.3 [1.9e-05]                                       | 0.3 [1.9e-05]                                       |
|                   | 7.0e+08                | 0.3 [14]                                             | 0.3 [10]                                              | 0.3 [1.5e-05]                                       | 0.3 [1.1e-05]                                       |

Table S12: Comparison of the four RMSE described in section 3.1 obtained with MLEM and Tikhonov methods on simulated data for <sup>204</sup>Tl beta spectrum. RMSE are normalized by the counting statistics and expressed in pcm. Numbers in brackets are the regularization parameter in each case.
